# Supplementary material for: Pimarane-derived diterpenoids with anti-Helicobacter pylori activity from the tuber of Icacina trichantha
Source: Royal Society of Chemistry journal article supplement (doi:10.1039/d1qo00374g), 2021-01-01

Supporting information

## **Pimarane-derived diterpenoids with anti-*Helicobacter pylori* activity from the tuber of *Icacina trichantha*†**

Ming-Ming Xu,<sup>‡a</sup> Junfei Zhou,<sup>‡a</sup> Liping Zeng,<sup>‡b</sup> Jingchen Xu,<sup>b</sup> Monday M. Onakpa,<sup>c</sup> Jin-Ao Duan,<sup>a</sup> Chun-Tao Che,<sup>d</sup> Hong kai Bi,<sup>\*b</sup> and Ming Zhao,<sup>\*a</sup>

<sup>a</sup>*Jiangsu Collaborative Innovation Centre of Chinese Medicinal Resources Industrialization, School of Pharmacy, Nanjing University of Chinese Medicine, Nanjing 210023, P. R. China. E-mail: mingzhao@njucm.edu.cn*

<sup>b</sup>*Department of Pathogen Biology, Jiangsu Key Laboratory of Pathogen Biology, Nanjing Medical University, Nanjing 211166, P. R. China. E-mail: hkbi@njmu.edu.cn*

<sup>c</sup>*Department of Veterinary Pharmacology and Toxicology, University of Abuja, Abuja 920001, Nigeria*

<sup>d</sup>*Department of Pharmaceutical Sciences, College of Pharmacy, University of Illinois at Chicago, Chicago, Illinois 60612, United States*

## Contents

|                                                                                                                                                                                                  |    |
|--------------------------------------------------------------------------------------------------------------------------------------------------------------------------------------------------|----|
| Fig. S1 Flow chart of extraction and isolation.....                                                                                                                                              | 4  |
| Table S1 Antibacterial activity results of EtOAc and H <sub>2</sub> O fractions and the main subfractions from tubers of <i>I. trichantha</i> against twelve bacterial species (MIC: µg/ml)..... | 5  |
| Table S2 Antibacterial activity results of compounds 1–12 isolated from tubers of <i>I. trichantha</i> against a series of bacterial species (MIC: µg/ml).....                                   | 5  |
| Table S3 <sup>1</sup> H [ $\delta$ , mult ( <i>J</i> in Hz)] and <sup>13</sup> C NMR spectroscopic data for 1 in chloroform- <i>d</i> and 2 in DMSO- <i>d</i> <sub>6</sub> .....                 | 6  |
| Table S4 GIAO <sup>13</sup> C NMR calculation of structure 1a and 1b.....                                                                                                                        | 7  |
| Table S5 Fractional inhibitory concentration (FIC) and interaction style of icacinlactone B (6) combined with four antibiotics against <i>H. pylori</i> strain G27.....                          | 8  |
| Table S6 Fractional inhibitory concentration (FIC) and interaction style of icacinlactone B (6) combined with four antibiotics against of <i>H. pylori</i> strain HP159.....                     | 8  |
| Table S7 Cartesian coordinate for the lowest energy conformer of 1 calculated at TD/B3LYP/6-311++G(d,p) level of theory in gas phase.....                                                        | 9  |
| Table S8 Cartesian coordinate for the lowest energy conformer of the aglycon of 2 calculated at B3LYP/6-31+G(d) level of theory in gas phase.....                                                | 11 |
| Fig. S2 <sup>1</sup> H NMR (400 MHz, chloroform- <i>d</i> ) spectrum of compound 1.....                                                                                                          | 12 |
| Fig. S3 <sup>13</sup> C NMR (100 MHz, chloroform- <i>d</i> ) spectrum of compound 1.....                                                                                                         | 12 |
| Fig. S4 DEPT135 (100 MHz, chloroform- <i>d</i> ) spectrum of compound 1.....                                                                                                                     | 13 |
| Fig. S5 <sup>1</sup> H– <sup>1</sup> H COSY spectrum (400 MHz, chloroform- <i>d</i> ) of compound 1.....                                                                                         | 13 |
| Fig. S6 HSQC spectrum (chloroform- <i>d</i> ) of compound 1 ( <sup>1</sup> H: 400 MHz, <sup>13</sup> C: 100 MHz).....                                                                            | 14 |
| Fig. S7 HMBC spectrum (chloroform- <i>d</i> ) of compound 1 ( <sup>1</sup> H: 400 MHz, <sup>13</sup> C: 100 MHz).....                                                                            | 14 |
| Fig. S8 NOESY spectrum (400 MHz, chloroform- <i>d</i> ) of compound 1.....                                                                                                                       | 15 |
| Fig. S9 IR spectrum of compound 1.....                                                                                                                                                           | 15 |
| Fig. S10 (+)-HR-ESI-MS spectrum of compound 1.....                                                                                                                                               | 16 |
| Fig. S11 UV spectrum of compound 1.....                                                                                                                                                          | 16 |
| Fig. S12 <sup>1</sup> H NMR (500 MHz, DMSO- <i>d</i> <sub>6</sub> ) spectrum of compound 2.....                                                                                                  | 17 |
| Fig. S13 <sup>13</sup> C NMR (125 MHz, DMSO- <i>d</i> <sub>6</sub> ) spectrum of compound 2.....                                                                                                 | 17 |
| Fig. S14 DEPT135 (125 MHz, DMSO- <i>d</i> <sub>6</sub> ) spectrum of compound 2.....                                                                                                             | 18 |
| Fig. S15 <sup>1</sup> H– <sup>1</sup> H COSY spectrum (500 MHz, DMSO- <i>d</i> <sub>6</sub> ) of compound 2.....                                                                                 | 18 |
| Fig. S16 HSQC spectrum (DMSO- <i>d</i> <sub>6</sub> ) of compound 2 ( <sup>1</sup> H: 500 MHz, <sup>13</sup> C: 125 MHz).....                                                                    | 19 |
| Fig. S17 HMBC spectrum (DMSO- <i>d</i> <sub>6</sub> ) of compound 2 ( <sup>1</sup> H: 500 MHz, <sup>13</sup> C: 125 MHz).....                                                                    | 19 |
| Fig. S18 NOESY spectrum (500 MHz, DMSO- <i>d</i> <sub>6</sub> ) of compound 2.....                                                                                                               | 20 |
| Fig. S19 IR spectrum of compound 2.....                                                                                                                                                          | 20 |
| Fig. S20 (–)-HR-ESI-MS spectrum of compound 2.....                                                                                                                                               | 21 |
| Fig. S21 UV spectrum of compound 2.....                                                                                                                                                          | 21 |

|                                                                                                                |    |
|----------------------------------------------------------------------------------------------------------------|----|
| Fig. S22 <sup>1</sup> H NMR (500 MHz, DMSO- <i>d</i> <sub>6</sub> ) spectrum of compound 3.....                | 22 |
| Fig. S23 <sup>13</sup> C NMR (125 MHz, DMSO- <i>d</i> <sub>6</sub> ) spectrum of compound 3.....               | 22 |
| Fig. S24 <sup>1</sup> H NMR (500 MHz, CD <sub>3</sub> OD- <i>d</i> <sub>4</sub> ) spectrum of compound 4.....  | 23 |
| Fig. S25 <sup>13</sup> C NMR (125 MHz, CD <sub>3</sub> OD- <i>d</i> <sub>4</sub> ) spectrum of compound 4..... | 23 |
| Fig. S26 <sup>1</sup> H NMR (500 MHz, DMSO- <i>d</i> <sub>6</sub> ) spectrum of compound 5.....                | 24 |
| Fig. S27 <sup>13</sup> C NMR (125 MHz, DMSO- <i>d</i> <sub>6</sub> ) spectrum of compound 5.....               | 24 |
| Fig. S28 <sup>1</sup> H NMR (500 MHz, DMSO- <i>d</i> <sub>6</sub> ) spectrum of compound 6.....                | 25 |
| Fig. S29 <sup>13</sup> C NMR (125 MHz, DMSO- <i>d</i> <sub>6</sub> ) spectrum of compound 6.....               | 25 |
| Fig. S30 <sup>1</sup> H NMR (500 MHz, Pyridine- <i>d</i> <sub>5</sub> ) spectrum of compound 7.....            | 26 |
| Fig. S31 <sup>13</sup> C NMR (125 MHz, pyridine- <i>d</i> <sub>5</sub> ) spectrum of compound 7.....           | 26 |
| Fig. S32 <sup>1</sup> H NMR (500 MHz, DMSO- <i>d</i> <sub>6</sub> ) spectrum of compound 8.....                | 27 |
| Fig. S33 <sup>13</sup> C NMR (125 MHz, DMSO- <i>d</i> <sub>6</sub> ) spectrum of compound 8.....               | 27 |
| Fig. S34 <sup>1</sup> H NMR (500 MHz, Pyridine- <i>d</i> <sub>5</sub> ) spectrum of compound 9.....            | 28 |
| Fig. S35 <sup>13</sup> C NMR (125 MHz, Pyridine- <i>d</i> <sub>5</sub> ) spectrum of compound 9.....           | 28 |
| Fig. S36 <sup>1</sup> H NMR (500 MHz, DMSO- <i>d</i> <sub>6</sub> ) spectrum of compound 10.....               | 29 |
| Fig. S37 <sup>13</sup> C NMR (125 MHz, DMSO- <i>d</i> <sub>6</sub> ) spectrum of compound 10.....              | 29 |
| Fig. S38 <sup>1</sup> H NMR (500 MHz, DMSO- <i>d</i> <sub>6</sub> ) spectrum of compound 11.....               | 30 |
| Fig. S39 <sup>13</sup> C NMR (125 MHz, DMSO- <i>d</i> <sub>6</sub> ) spectrum of compound 11.....              | 30 |
| Fig. S40 <sup>1</sup> H NMR (500 MHz, DMSO- <i>d</i> <sub>6</sub> ) spectrum of compound 12.....               | 31 |
| Fig. S41 <sup>13</sup> C NMR (125 MHz, DMSO- <i>d</i> <sub>6</sub> ) spectrum of compound 12.....              | 31 |
| Fig. S42 HPLC chromatogram of the derivative of the standard L-Glucose.....                                    | 32 |
| Fig. S43 HPLC chromatogram of the derivative of the standard D-Glucose.....                                    | 32 |
| Fig. S44 HPLC chromatogram of derivative of the hydrolysate of compound 2.....                                 | 32 |

**Fig. S1** Flow chart of extraction and isolation.

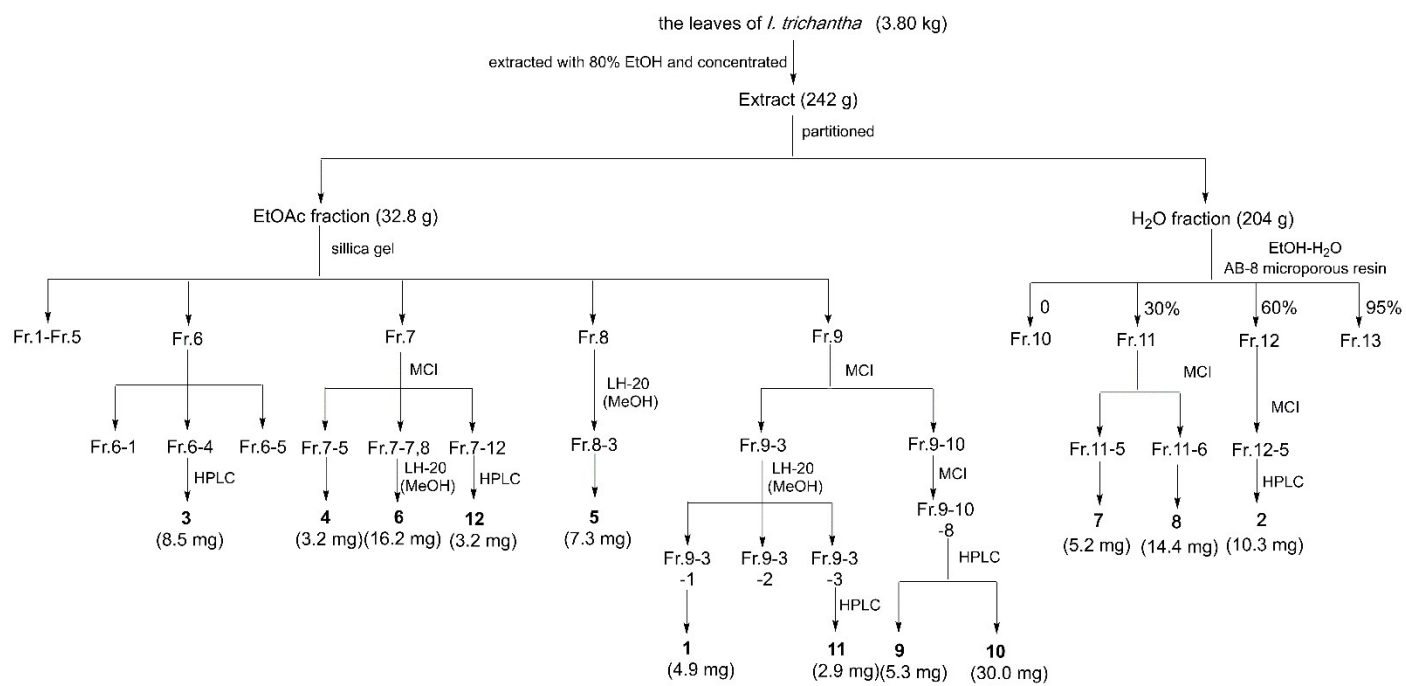



|          |     |   |   |      |      |      |      |      |      |      |      |      |      |
|----------|-----|---|---|------|------|------|------|------|------|------|------|------|------|
| MC2 155  | 16  | / | / | >128 | >128 | >128 | >128 | >128 | >128 | >128 | >128 | >128 | >128 |
| ATCC1943 | 2   | / | / | >128 | /    | /    | >128 | /    | /    | /    | /    | /    | /    |
| 4        |     |   |   |      |      |      |      |      |      |      |      |      |      |
| FA2-2    | 4   | / | / | >128 | /    | /    | >128 | /    | /    | /    | /    | /    | /    |
| 168      | 4   | / | / | 128  | /    | /    | >128 | /    | /    | /    | /    | /    | /    |
| ATCC6538 | 0.5 | / | / | >128 | /    | /    | >128 | /    | /    | /    | /    | /    | /    |

<sup>a</sup> MICs of MTZ are determined against *Helicobacter* and non-*Helicobacter* species, respectively.

<sup>b</sup> MTZ, metronidazole.

NA: No Inhibition.

**Table S3** <sup>1</sup>H [ $\delta$ , mult ( $J$  in Hz)] and <sup>13</sup>C NMR spectroscopic data for **1** in chloroform-*d* and **2** in DMSO-*d*<sub>6</sub>

| no.          | <b>1</b>                         |                     | <b>2</b>                         |                     |
|--------------|----------------------------------|---------------------|----------------------------------|---------------------|
|              | $\delta_{\text{H}}$ ( $J$ in Hz) | $\delta_{\text{C}}$ | $\delta_{\text{H}}$ ( $J$ in Hz) | $\delta_{\text{C}}$ |
| 1 $\alpha$   | 2.38, ddd (13.4, 9.8, 3.3)       | 40.8                | 1.66, m                          | 36.4                |
| 1 $\beta$    | 2.54, dd (13.8, 2.8)             |                     | 1.44, m                          |                     |
| 2 $\alpha$   | 4.38 dd (7.2, 9.6)               | 65.9                | 2.17, m                          | 28.7                |
| 2 $\beta$    |                                  |                     | 1.68, m                          |                     |
| 3            |                                  | 96.8                | 3.42, dd (10.9, 5.6)             | 84.3                |
| 4            |                                  | 48.4                |                                  | 45.9                |
| 5            | 2.26, m                          | 51.7                | 1.52, d (3.0)                    | 45.7                |
| 6            | 5.13, ddd (9.8, 7.9, 5.7)        | 74.7                | 4.01, t (3.6)                    | 62.6                |
| 7 $\alpha$   | 4.11, m                          | 25.7                | 1.57, td (13.6, 2.4)             | 33.3                |
| 7 $\beta$    | 2.97, dd (17.2, 5.7)             |                     | 1.89, m                          |                     |
| 8            |                                  | 109.2               | 3.06, m                          | 28.9                |
| 9            |                                  | 132.7               | 1.43, m                          | 37.8                |
| 10           |                                  | 36.0                |                                  | 33.2                |
| 11 $\alpha$  | 6.56, s                          | 100.1               | 1.80, dd (11.5, 5.7)             | 17.0                |
| 11 $\beta$   |                                  |                     | 1.16, m                          |                     |
| 12 $\alpha$  |                                  | 151.8               | 2.17, m                          | 17.8                |
| 12 $\beta$   |                                  |                     | 1.97, ddt (18.7, 11.5, 6.0)      |                     |
| 13           |                                  | 118.0               |                                  | 111.3               |
| 14           |                                  | 153.8               |                                  | 192.1               |
| 15 $\alpha$  | 6.34, s                          | 100.6               |                                  | 200.1               |
| 15 $\beta$   |                                  |                     |                                  |                     |
| 16           |                                  | 161.1               | 4.57, d (5.5)                    | 74.9                |
| 18           | 1.45, s                          | 19.6                | 1.29, s                          | 17.4                |
| 19           |                                  | 179.6               |                                  | 171.8               |
| 20 $\alpha$  | 3.90, d (2.6)                    | 70.7                | 4.51, d (11.3)                   | 77.3                |
| 20 $\beta$   | 4.16, dd (6.8, 2.6)              |                     | 3.87, d (11.3)                   |                     |
| 12-OCH3      | 3.93, s                          | 55.7                |                                  |                     |
| 1' $\alpha$  | 1.88, m                          | 36.6                | 4.19, d (7.8)                    | 104.5               |
| 1' $\beta$   | 1.10, m                          |                     |                                  |                     |
| 2' $\alpha$  | 1.52, m                          | 19.4                | 3.06, m                          | 76.8                |
| 2' $\beta$   | 1.85, m                          |                     |                                  |                     |
| 3' $\alpha$  | 2.13, m                          | 37.1                | 3.06, m                          | 76.9                |
| 3' $\beta$   | 0.96, m                          |                     |                                  |                     |
| 4'           |                                  | 43.3                | 2.94, td (8.5, 4.2)              | 73.9                |
| 5' $\alpha$  | 1.60, dd (11.8, 2.6)             | 48.3                | 3.06, m                          | 70.0                |
| 6' $\alpha$  | 2.22, m                          | 26.2                | 3.64, m                          | 61.1                |
| 6' $\beta$   |                                  |                     | 3.42, dd (10.9, 5.6)             |                     |
| 7'           | 3.45, d (5.8)                    | 41.6                |                                  |                     |
| 8'           |                                  | 122.9               |                                  |                     |
| 9'           |                                  | 140.3               |                                  |                     |
| 10'          |                                  | 38.9                |                                  |                     |
| 11' $\alpha$ | 0.93, m                          | 20.8                |                                  |                     |
| 11' $\beta$  | 2.13, m                          |                     |                                  |                     |

|                 |                  |       |
|-----------------|------------------|-------|
| 12 <sup>α</sup> | 1.77, m          | 30.5  |
| 12 <sup>β</sup> | 1.69, m          |       |
| 13 <sup>γ</sup> |                  | 44.3  |
| 14 <sup>α</sup> | 2.26, m          | 37.5  |
| 14 <sup>β</sup> | 1.92, m          |       |
| 15 <sup>γ</sup> |                  | 214.8 |
| 16 <sup>γ</sup> | 4.33, brd (16.8) | 64.1  |
| 17 <sup>γ</sup> | 1.14, s          | 20.7  |
| 18 <sup>γ</sup> | 0.97, s          | 28.5  |
| 19 <sup>γ</sup> |                  | 183.2 |
| 20 <sup>γ</sup> | 0.93, s          | 17.5  |

**Table S4** GIAO <sup>13</sup>C NMR calculation of structure **1a** and **1b**

| no.                 | exptl. $\delta_C$ | calcd $\delta_C$ <b>1a</b> | deviation | calcd $\delta_C$ <b>1b</b> | deviation |
|---------------------|-------------------|----------------------------|-----------|----------------------------|-----------|
| 1                   | 40.8              | 40.8                       | 0.0       | 41.0                       | 0.2       |
| 2                   | 65.9              | 66.1                       | 0.2       | 66.1                       | 0.2       |
| 3                   | 96.8              | 96.3                       | -0.5      | 96.7                       | -0.1      |
| 4                   | 48.4              | 50.2                       | 1.8       | 50.1                       | 1.7       |
| 5                   | 51.7              | 53.5                       | 1.8       | 53.7                       | 2.0       |
| 6                   | 74.7              | 75.3                       | 0.6       | 75.3                       | 0.6       |
| 7                   | 25.7              | 25.3                       | -0.4      | 23.8                       | -1.9      |
| 8                   | 109.2             | 108.5                      | -0.7      | 107.2                      | -2.0      |
| 9                   | 132.7             | 136.3                      | 3.6       | 135.4                      | 2.7       |
| 10                  | 36.0              | 35.5                       | -0.5      | 34.7                       | -1.3      |
| 11                  | 100.1             | 97.1                       | -3.0      | 100.5                      | 0.4       |
| 12                  | 151.8             | 148.9                      | -2.9      | 148.5                      | -3.3      |
| 13                  | 118.0             | 115.8                      | -2.2      | 113.2                      | -4.8      |
| 14                  | 153.8             | 152.6                      | -1.2      | 152.3                      | -1.5      |
| 15                  | 100.6             | 102.2                      | 1.6       | 103.7                      | 3.1       |
| 16                  | 161.1             | 162.6                      | 1.5       | 160.6                      | -0.5      |
| 18                  | 19.6              | 17.4                       | -2.2      | 17.8                       | -1.8      |
| 19                  | 179.6             | 178.6                      | -1.0      | 177.1                      | -2.5      |
| 20                  | 70.7              | 68.7                       | -2.9      | 68.7                       | -2.9      |
| 12-OCH <sub>3</sub> | 55.7              | 56.1                       | 0.4       | 56.3                       | 0.6       |
| 1 <sup>γ</sup>      | 36.6              | 36.6                       | 0.0       | 35.5                       | -1.1      |
| 2 <sup>γ</sup>      | 19.4              | 16.9                       | -2.5      | 16.6                       | -2.8      |
| 3 <sup>γ</sup>      | 37.1              | 37.9                       | 0.8       | 39.6                       | 2.5       |
| 4 <sup>γ</sup>      | 43.3              | 44.5                       | 1.2       | 43.4                       | 0.1       |
| 5 <sup>γ</sup>      | 48.3              | 49.8                       | 1.5       | 49.7                       | 1.4       |
| 6 <sup>γ</sup>      | 26.2              | 26.2                       | 0.0       | 25.4                       | -0.8      |
| 7 <sup>γ</sup>      | 41.6              | 42.4                       | 0.8       | 41.8                       | 0.2       |
| 8 <sup>γ</sup>      | 122.9             | 125.8                      | 2.9       | 124.4                      | 1.5       |
| 9 <sup>γ</sup>      | 140.3             | 144.0                      | 3.7       | 146.9                      | 6.6       |
| 10 <sup>γ</sup>     | 38.9              | 40.0                       | 1.1       | 40.5                       | 1.6       |
| 11 <sup>γ</sup>     | 20.8              | 21.6                       | 0.8       | 23.0                       | 2.2       |
| 12 <sup>γ</sup>     | 30.5              | 31.2                       | 0.7       | 32.7                       | 2.2       |
| 13 <sup>γ</sup>     | 44.3              | 45.3                       | 1.0       | 47.5                       | 3.2       |
| 14 <sup>γ</sup>     | 37.5              | 39.4                       | 1.9       | 40.2                       | 2.7       |
| 15 <sup>γ</sup>     | 214.8             | 214.5                      | -0.3      | 218.0                      | 3.2       |
| 16 <sup>γ</sup>     | 64.1              | 62.4                       | -1.7      | 61.8                       | -2.3      |
| 17 <sup>γ</sup>     | 20.7              | 21.0                       | 0.3       | 19.1                       | -1.6      |

|     |       |       |      |       |      |
|-----|-------|-------|------|-------|------|
| 18' | 28.5  | 26.8  | -1.7 | 26.5  | -2.0 |
| 19' | 183.2 | 181.3 | -1.9 | 179.9 | -3.3 |
| 20' | 17.5  | 14.5  | -3.0 | 15.1  | -2.4 |
|     |       | MAE   | 1.4  | MAE   | 1.9  |
|     |       | RMS   | 1.8  | RMS   | 2.3  |
|     |       | sDP4+ | 100% | sDP4+ | 0%   |

---



**Table S5** Fractional inhibitory concentration (FIC) and interaction style of icacinlactone B (**6**) combined with four antibiotics against *H. pylori* strain G27

|                | MIC of <b>6</b> (µg/mL) |             | MIC of MTZ (µg/mL) |             | MIC of CLR (µg/mL) |             | MIC of AMX (µg/mL) |             | MIC of LVX (µg/mL) |             | FICI | Interaction     |
|----------------|-------------------------|-------------|--------------------|-------------|--------------------|-------------|--------------------|-------------|--------------------|-------------|------|-----------------|
|                | Alone                   | Combination | Alone              | Combination | Alone              | Combination | Alone              | Combination | Alone              | Combination |      |                 |
| <b>6</b> + MTZ | 8                       | 4           | 2                  | 0.5         |                    |             |                    |             |                    |             | 0.75 | additive effect |
| <b>6</b> + CLR | 8                       | 2           |                    |             | 0.008              | 0.004       |                    |             |                    |             | 0.75 | additive effect |
| <b>6</b> + AMX | 8                       | 2           |                    |             |                    |             | 0.125              | 0.125       |                    |             | 1.25 | indifference    |
| <b>6</b> + LVX | 8                       | 4           |                    |             |                    |             |                    |             | 0.25               | 0.25        | 1.5  | indifference    |

FIC of **6** = MIC of **6** in combination with antibiotic/MIC of **6** alone.

FIC of antibiotic = MIC of antibiotic in combination with **6**/MIC of antibiotic alone.

FIC index = FIC of **6**+ FIC of antibiotic.

FICI ≤ 0.5, synergy; 0.5 < FICI ≤ 1, additive effect; 1 < FICI ≤ 2, indifference; FICI > 4.0, antagonism.

(CLR: clarithromycin, AMX: amoxicillin, MTZ: metronidazole; LVX: levofloxacin)

**Table S6** Fractional inhibitory concentration (FIC) and interaction style of icacinlactone B (**6**) combined with four antibiotics against of *H. pylori* strain HP159

|                | MIC of <b>6</b> (µg/mL) |             | MIC of MTZ (µg/mL) |             | MIC of CLR (µg/mL) |             | MIC of AMX (µg/mL) |             | MIC of LVX (µg/mL) |             | FICI | Interaction     |
|----------------|-------------------------|-------------|--------------------|-------------|--------------------|-------------|--------------------|-------------|--------------------|-------------|------|-----------------|
|                | Alone                   | Combination | Alone              | Combination | Alone              | Combination | Alone              | Combination | Alone              | Combination |      |                 |
| <b>6</b> + MTZ | 8                       | 4           | 16                 | 1           |                    |             |                    |             |                    |             | 0.56 | additive effect |
| <b>6</b> + CLR | 8                       | 2           |                    |             | 2                  | 1           |                    |             |                    |             | 0.75 | additive effect |
| <b>6</b> + AMX | 8                       | 4           |                    |             |                    |             | 0.125              | 0.008       |                    |             | 0.56 | indifference    |
| <b>6</b> + LVX | 8                       | 2           |                    |             |                    |             |                    |             | 8                  | 8           | 1.25 | indifference    |

FIC of **6** = MIC of **6** in combination with antibiotic/MIC of **6** alone.

FIC of antibiotic = MIC of antibiotic in combination with **7**/MIC of antibiotic alone.

FIC index = FIC of **6** + FIC of antibiotic.

FICI ≤ 0.5, synergy; 0.5 < FICI ≤ 1, additive effect; 1 < FICI ≤ 2, indifference; FICI > 4.0, antagonism.

(CLR: clarithromycin, AMX: amoxicillin, MTZ: metronidazole; LVX: levofloxacin)

**Table S7** Cartesian coordinate for the lowest energy conformer of **1** calculated at TD/B3LYP/6-311++G(d,p) level of theory in gas phase

| Center number | Atomic number | Atomic type | Coordinates (Angstroms) |          |          |
|---------------|---------------|-------------|-------------------------|----------|----------|
|               |               |             | X                       | Y        | Z        |
| 1             | 6             | 0           | 6.829779                | -1.77288 | 1.554311 |
| 2             | 6             | 0           | 6.075429                | -2.96861 | 0.966137 |
| 3             | 6             | 0           | 5.354024                | -2.63176 | -0.37258 |
| 4             | 6             | 0           | 4.48147                 | -1.34189 | -0.15448 |
| 5             | 6             | 0           | 5.204936                | -0.09872 | 0.456368 |
| 6             | 6             | 0           | 6.252689                | 0.579895 | -0.47069 |
| 7             | 6             | 0           | 3.664225                | -0.93802 | -1.38853 |
| 8             | 6             | 0           | 2.546942                | 0.058417 | -1.01977 |
| 9             | 6             | 0           | 2.98682                 | 1.078739 | 0.038455 |
| 10            | 6             | 0           | 4.13336                 | 0.982014 | 0.742511 |
| 11            | 6             | 0           | 2.012621                | 2.233031 | 0.225803 |
| 12            | 6             | 0           | 2.648605                | 3.487657 | 0.849337 |
| 13            | 6             | 0           | 3.392462                | 3.039371 | 2.115738 |
| 14            | 6             | 0           | 4.487818                | 2.008432 | 1.810704 |
| 15            | 6             | 0           | 1.557077                | 4.526167 | 1.202456 |
| 16            | 6             | 0           | 3.618198                | 4.192816 | -0.10867 |
| 17            | 6             | 0           | 3.350322                | 4.219227 | -1.61506 |
| 18            | 8             | 0           | 4.259748                | 5.056333 | -2.27228 |
| 19            | 8             | 0           | 4.598445                | 4.79804  | 0.300425 |
| 20            | 1             | 0           | 3.765578                | -1.64064 | 0.620675 |
| 21            | 6             | 0           | 5.910942                | -0.5603  | 1.760922 |
| 22            | 6             | 0           | 6.356814                | -2.55542 | -1.53981 |
| 23            | 6             | 0           | -2.27294                | -0.35503 | -0.34684 |
| 24            | 6             | 0           | -3.16033                | -1.3393  | 0.135953 |
| 25            | 6             | 0           | -0.92733                | -0.71053 | -0.34715 |
| 26            | 6             | 0           | -0.421                  | -1.94304 | 0.091172 |
| 27            | 6             | 0           | -1.32806                | -2.90309 | 0.565017 |
| 28            | 6             | 0           | -2.68568                | -2.5864  | 0.58225  |
| 29            | 8             | 0           | 0.107632                | 0.081474 | -0.77817 |
| 30            | 6             | 0           | 1.276361                | -0.64592 | -0.60502 |
| 31            | 6             | 0           | 1.008831                | -1.87299 | -0.08465 |
| 32            | 8             | 0           | -0.94047                | -4.13283 | 1.01544  |
| 33            | 6             | 0           | -2.75528                | 0.985792 | -0.85404 |
| 34            | 1             | 0           | 0.024604                | -4.20757 | 0.948981 |
| 35            | 6             | 0           | -5.23076                | -1.07797 | -1.27833 |
| 36            | 6             | 0           | -4.77743                | 0.472346 | 0.699867 |
| 37            | 6             | 0           | -5.55152                | -1.85349 | 1.038446 |
| 38            | 1             | 0           | -3.37051                | -3.33766 | 0.957947 |
| 39            | 1             | 0           | -1.92623                | 1.699118 | -0.87554 |
| 40            | 1             | 0           | -3.10986                | 0.906263 | -1.88949 |
| 41            | 1             | 0           | -4.48953                | 0.434261 | 1.75549  |
| 42            | 6             | 0           | -6.22792                | 0.980195 | 0.539459 |
| 43            | 6             | 0           | -3.91459                | 1.540767 | -0.00736 |
| 44            | 8             | 0           | -4.8205                 | 2.301221 | -0.85409 |
| 45            | 1             | 0           | -3.52532                | 2.247901 | 0.732907 |
| 46            | 6             | 0           | -7.03104                | -1.43336 | 0.839462 |
| 47            | 6             | 0           | 4.352812                | -3.7778  | -0.59981 |
| 48            | 8             | 0           | 3.458047                | -4.07718 | 0.170577 |
| 49            | 8             | 0           | 4.540019                | -4.46627 | -1.74759 |
| 50            | 1             | 0           | -5.25325                | -1.76787 | 2.089461 |
| 51            | 1             | 0           | -5.48154                | -2.90838 | 0.7588   |
| 52            | 1             | 0           | 7.681004                | -1.5044  | 0.916484 |
| 53            | 1             | 0           | 7.261551                | -2.06526 | 2.519639 |
| 54            | 1             | 0           | 6.758846                | -3.81344 | 0.809569 |
| 55            | 1             | 0           | 5.318045                | -3.30044 | 1.685978 |

|    |   |   |          |          |          |
|----|---|---|----------|----------|----------|
| 56 | 1 | 0 | 1.740016 | -2.63581 | 0.144436 |
| 57 | 1 | 0 | 6.530956 | 1.557682 | -0.06503 |
| 58 | 1 | 0 | 4.314155 | -0.47437 | -2.1376  |
| 59 | 1 | 0 | 3.218176 | -1.81331 | -1.87417 |
| 60 | 1 | 0 | 2.281948 | 0.624322 | -1.92596 |
| 61 | 1 | 0 | 1.546356 | 2.471177 | -0.73835 |
| 62 | 1 | 0 | 1.175194 | 1.92217  | 0.865876 |
| 63 | 1 | 0 | 2.649038 | 2.603658 | 2.79601  |
| 64 | 1 | 0 | 3.833887 | 3.900903 | 2.625993 |
| 65 | 1 | 0 | 5.404844 | 2.537816 | 1.520033 |
| 66 | 1 | 0 | 4.735669 | 1.488655 | 2.743465 |
| 67 | 1 | 0 | 2.001522 | 5.427976 | 1.63658  |
| 68 | 1 | 0 | 0.972857 | 4.820637 | 0.322916 |
| 69 | 1 | 0 | 0.86477  | 4.098484 | 1.936643 |
| 70 | 1 | 0 | 3.420547 | 3.184637 | -1.99066 |
| 71 | 1 | 0 | 2.315309 | 4.548583 | -1.79861 |
| 72 | 1 | 0 | 4.88206  | 5.345016 | -1.57478 |
| 73 | 1 | 0 | 5.147158 | -0.82353 | 2.506702 |
| 74 | 1 | 0 | 6.495547 | 0.263251 | 2.18552  |
| 75 | 1 | 0 | 5.873545 | -2.2699  | -2.47837 |
| 76 | 1 | 0 | 6.827503 | -3.52957 | -1.69926 |
| 77 | 1 | 0 | 7.149999 | -1.83523 | -1.33722 |
| 78 | 6 | 0 | -4.63804 | -0.97706 | 0.149969 |
| 79 | 6 | 0 | -7.08178 | -0.1768  | -0.05107 |
| 80 | 6 | 0 | -6.11496 | 2.044604 | -0.55443 |
| 81 | 6 | 0 | -6.82472 | 1.609372 | 1.808916 |
| 82 | 8 | 0 | -8.41333 | 0.171625 | -0.24657 |
| 83 | 8 | 0 | -6.53233 | -0.48321 | -1.33626 |
| 84 | 8 | 0 | -7.7227  | -2.49669 | 0.205939 |
| 85 | 1 | 0 | -5.30248 | -2.13713 | -1.55877 |
| 86 | 1 | 0 | -7.50484 | -1.19715 | 1.803269 |
| 87 | 1 | 0 | -4.61107 | -0.57482 | -2.02531 |
| 88 | 1 | 0 | -8.40943 | 0.979143 | -0.79974 |
| 89 | 1 | 0 | -8.51415 | -2.10277 | -0.20092 |
| 90 | 1 | 0 | -7.82315 | 2.004533 | 1.60688  |
| 91 | 1 | 0 | 3.854173 | -5.16167 | -1.75696 |
| 92 | 1 | 0 | -6.1942  | 2.431184 | 2.167973 |
| 93 | 1 | 0 | -6.90139 | 0.871572 | 2.613876 |
| 94 | 8 | 0 | -7.0373  | 2.605833 | -1.10206 |
| 95 | 1 | 0 | 5.863033 | 0.750949 | -1.4779  |
| 96 | 1 | 0 | 7.17599  | 0.003279 | -0.56038 |

---

**Table S8** Cartesian coordinate for the lowest energy conformer of the aglycon of **2** calculated at B3LYP/6-31+G(d) level of theory in gas phase

| Center number | Atomic number | Atomic type | Coordinates (Angstroms) |          |          |
|---------------|---------------|-------------|-------------------------|----------|----------|
|               |               |             | X                       | Y        | Z        |
| 1             | 6             | 0           | -2.83256                | 2.128613 | 0.264403 |
| 2             | 6             | 0           | -3.39871                | 1.145552 | -0.76727 |
| 3             | 6             | 0           | -2.78713                | -0.2977  | -0.59803 |
| 4             | 6             | 0           | -1.24051                | -0.18657 | -0.73413 |
| 5             | 6             | 0           | -0.68312                | 0.688788 | 0.421339 |
| 6             | 6             | 0           | -1.29684                | 2.106734 | 0.27493  |
| 7             | 6             | 0           | -0.54171                | -1.54937 | -0.90266 |
| 8             | 6             | 0           | 0.978748                | -1.38935 | -0.97652 |
| 9             | 6             | 0           | 1.533706                | -0.64717 | 0.259584 |
| 10            | 6             | 0           | 0.889805                | 0.761918 | 0.447419 |
| 11            | 6             | 0           | 3.017361                | -0.512   | 0.171859 |
| 12            | 6             | 0           | 3.712198                | 0.628719 | -0.06159 |
| 13            | 6             | 0           | 3.050591                | 1.957085 | -0.25954 |
| 14            | 6             | 0           | 1.539289                | 1.782357 | -0.52324 |
| 15            | 8             | 0           | 3.767524                | -1.63598 | 0.324511 |
| 16            | 6             | 0           | 5.152507                | -1.23625 | 0.18346  |
| 17            | 6             | 0           | 5.124284                | 0.279805 | -0.07255 |
| 18            | 8             | 0           | 6.111844                | 0.981933 | -0.24715 |
| 19            | 8             | 0           | -4.81827                | 1.150287 | -0.76831 |
| 20            | 6             | 0           | -1.10741                | 0.071034 | 1.773338 |
| 21            | 8             | 0           | -2.46295                | -0.41947 | 1.864513 |
| 22            | 6             | 0           | -3.22371                | -0.74046 | 0.799701 |
| 23            | 8             | 0           | -4.32196                | -1.22471 | 1.002988 |
| 24            | 6             | 0           | -3.39588                | -1.22988 | -1.65952 |
| 25            | 1             | 0           | 1.158092                | 1.10008  | 1.461808 |
| 26            | 1             | 0           | 1.317695                | -1.27351 | 1.133861 |
| 27            | 1             | 0           | -1.04478                | 0.346056 | -1.67781 |
| 28            | 8             | 0           | -0.93005                | -2.39315 | 0.191428 |
| 29            | 1             | 0           | -3.18858                | 3.134963 | 0.015525 |
| 30            | 1             | 0           | -3.23874                | 1.893973 | 1.255738 |
| 31            | 1             | 0           | -3.11841                | 1.480684 | -1.77537 |
| 32            | 1             | 0           | -0.91649                | 2.757332 | 1.074602 |
| 33            | 1             | 0           | -0.9529                 | 2.540738 | -0.67119 |
| 34            | 1             | 0           | -0.88973                | -1.99746 | -1.84271 |
| 35            | 1             | 0           | 1.451958                | -2.37611 | -1.05646 |
| 36            | 1             | 0           | 1.235952                | -0.84496 | -1.89487 |
| 37            | 1             | 0           | 3.519856                | 2.495733 | -1.09221 |
| 38            | 1             | 0           | 3.203373                | 2.588885 | 0.628195 |
| 39            | 1             | 0           | 1.385222                | 1.467137 | -1.56434 |
| 40            | 1             | 0           | 1.0662                  | 2.761606 | -0.42143 |
| 41            | 1             | 0           | 5.591142                | -1.7862  | -0.65429 |
| 42            | 1             | 0           | 5.682773                | -1.48872 | 1.106278 |
| 43            | 1             | 0           | -1.03372                | 0.823975 | 2.565642 |
| 44            | 1             | 0           | -0.47533                | -0.77583 | 2.041994 |
| 45            | 1             | 0           | -3.13322                | -2.27423 | -1.47233 |
| 46            | 1             | 0           | -4.48346                | -1.15463 | -1.66035 |
| 47            | 1             | 0           | -3.03429                | -0.94412 | -2.65561 |
| 48            | 1             | 0           | -0.67548                | -3.30944 | 0.002801 |
| 49            | 1             | 0           | -5.14178                | 0.591711 | -0.03735 |

**Fig. S2**  $^1\text{H}$  NMR (400 MHz, chloroform-*d*) spectrum of compound **1**

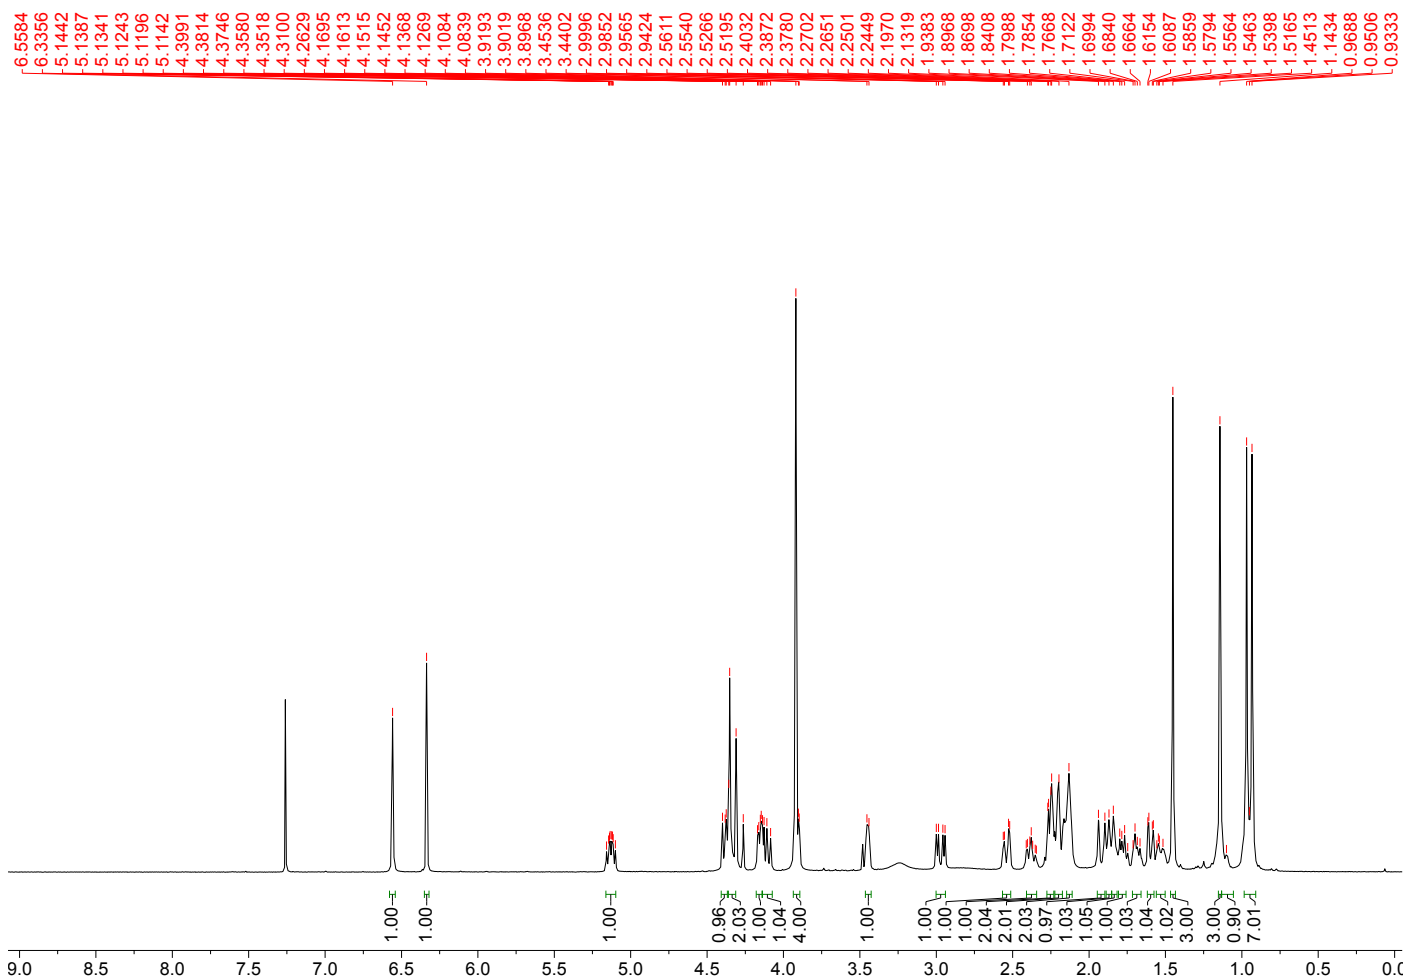

**Fig. S3**  $^{13}\text{C}$  NMR (100 MHz, chloroform-*d*) spectrum of compound **1**

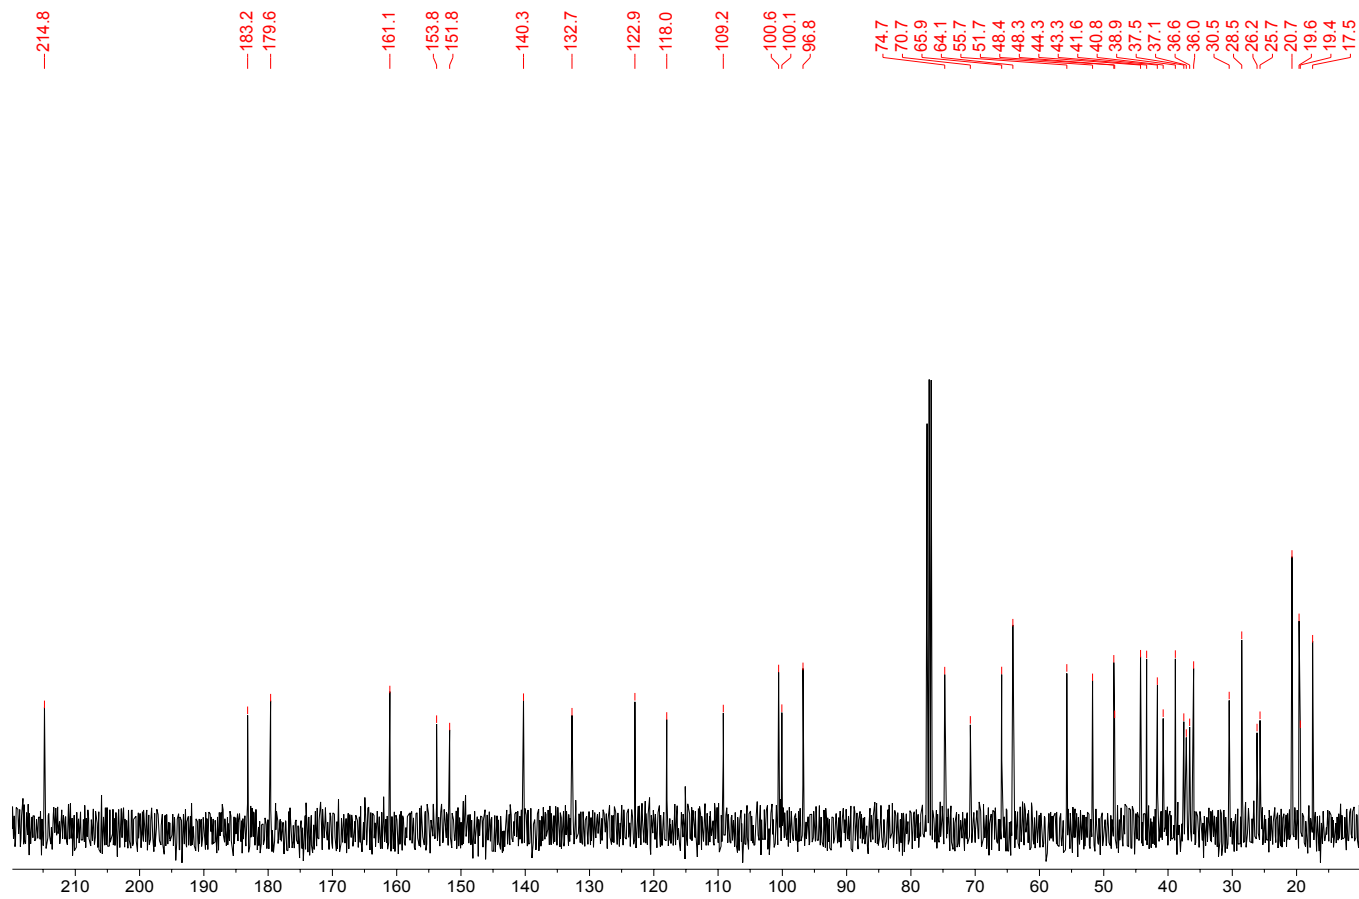

**Fig. S4** DEPT135 (100 MHz, chloroform-*d*) spectrum of compound **1**

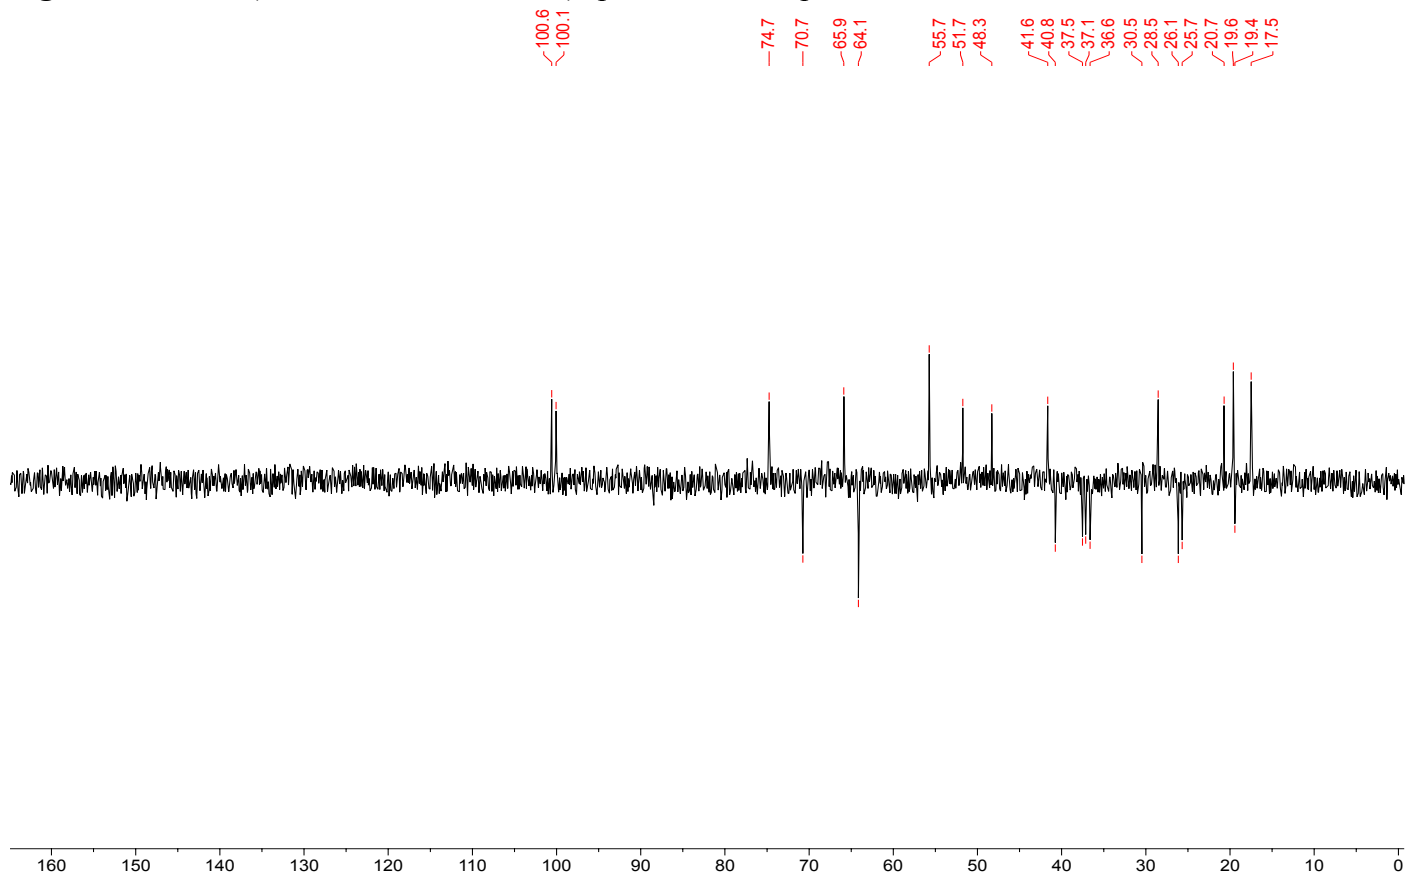

**Fig. S5**  $^1\text{H}$ - $^1\text{H}$  COSY spectrum (400 MHz, chloroform-*d*) of compound **1**

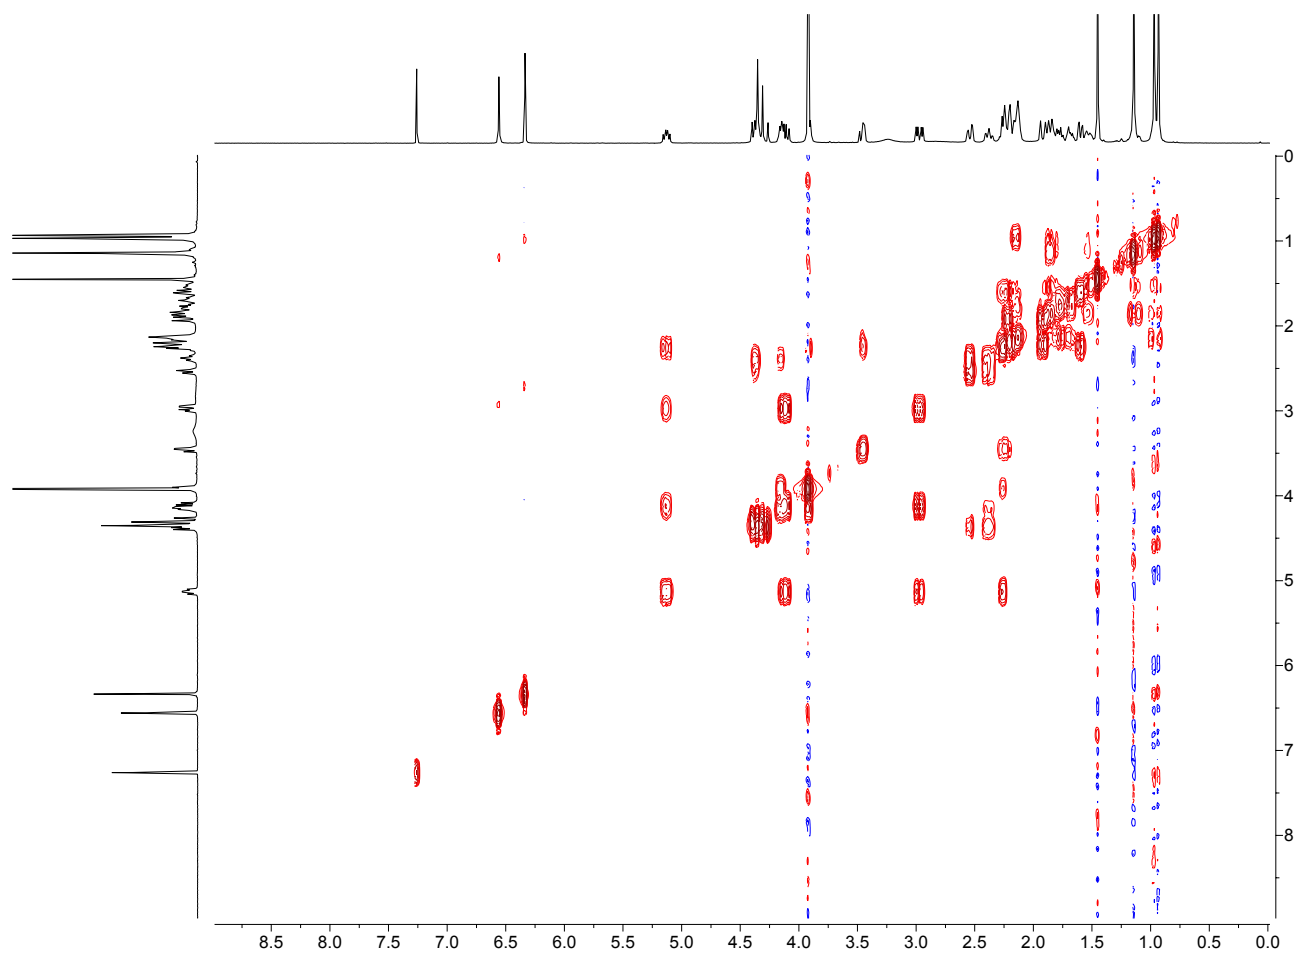

**Fig. S6** HSQC spectrum (chloroform-*d*) of compound **1** ( $^1\text{H}$ : 400 MHz,  $^{13}\text{C}$ : 100 MHz)

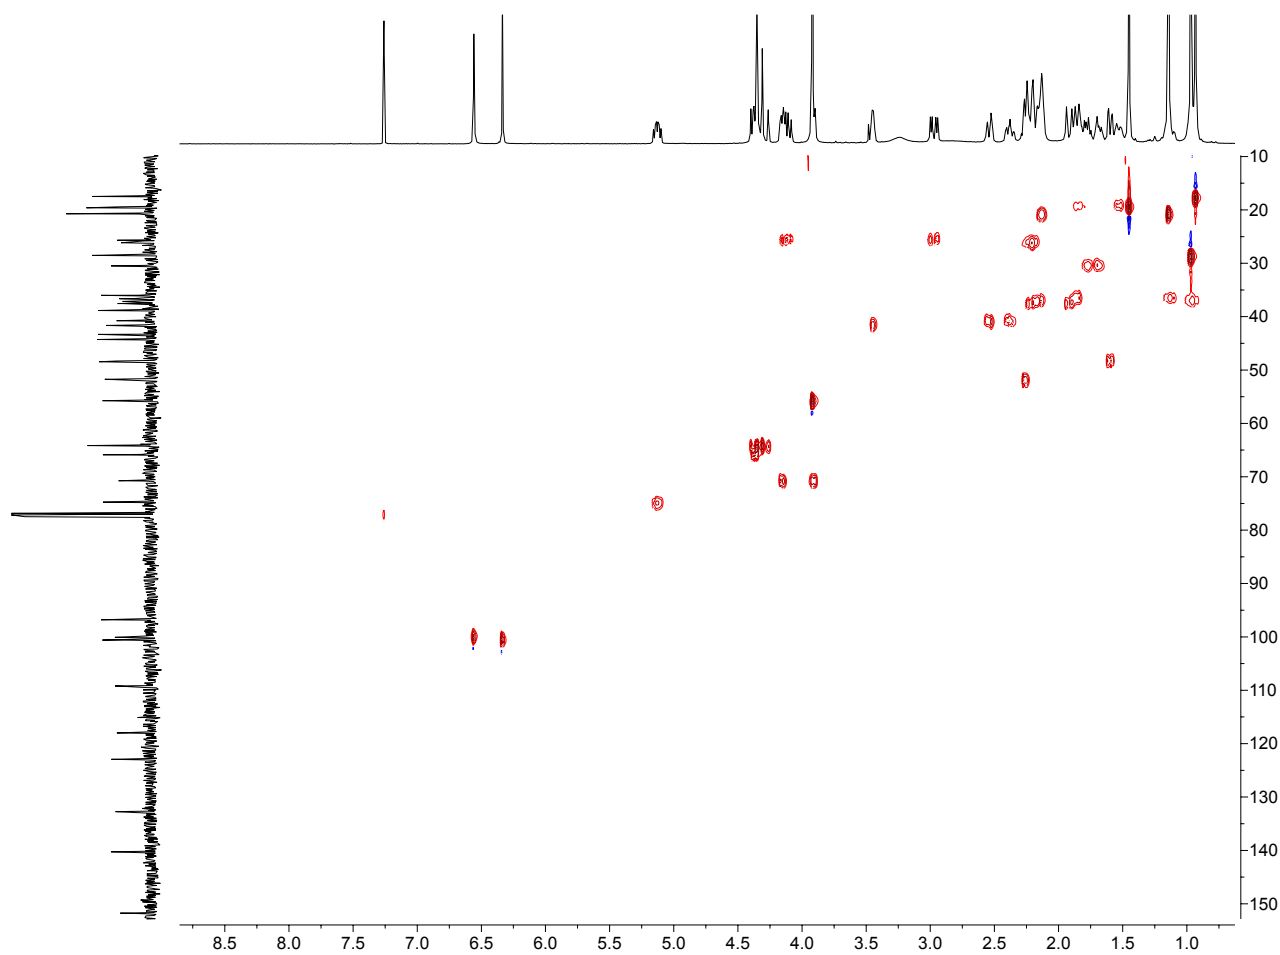

**Fig. S7** HMBC spectrum (chloroform-*d*) of compound **1** ( $^1\text{H}$ : 400 MHz,  $^{13}\text{C}$ : 100 MHz)

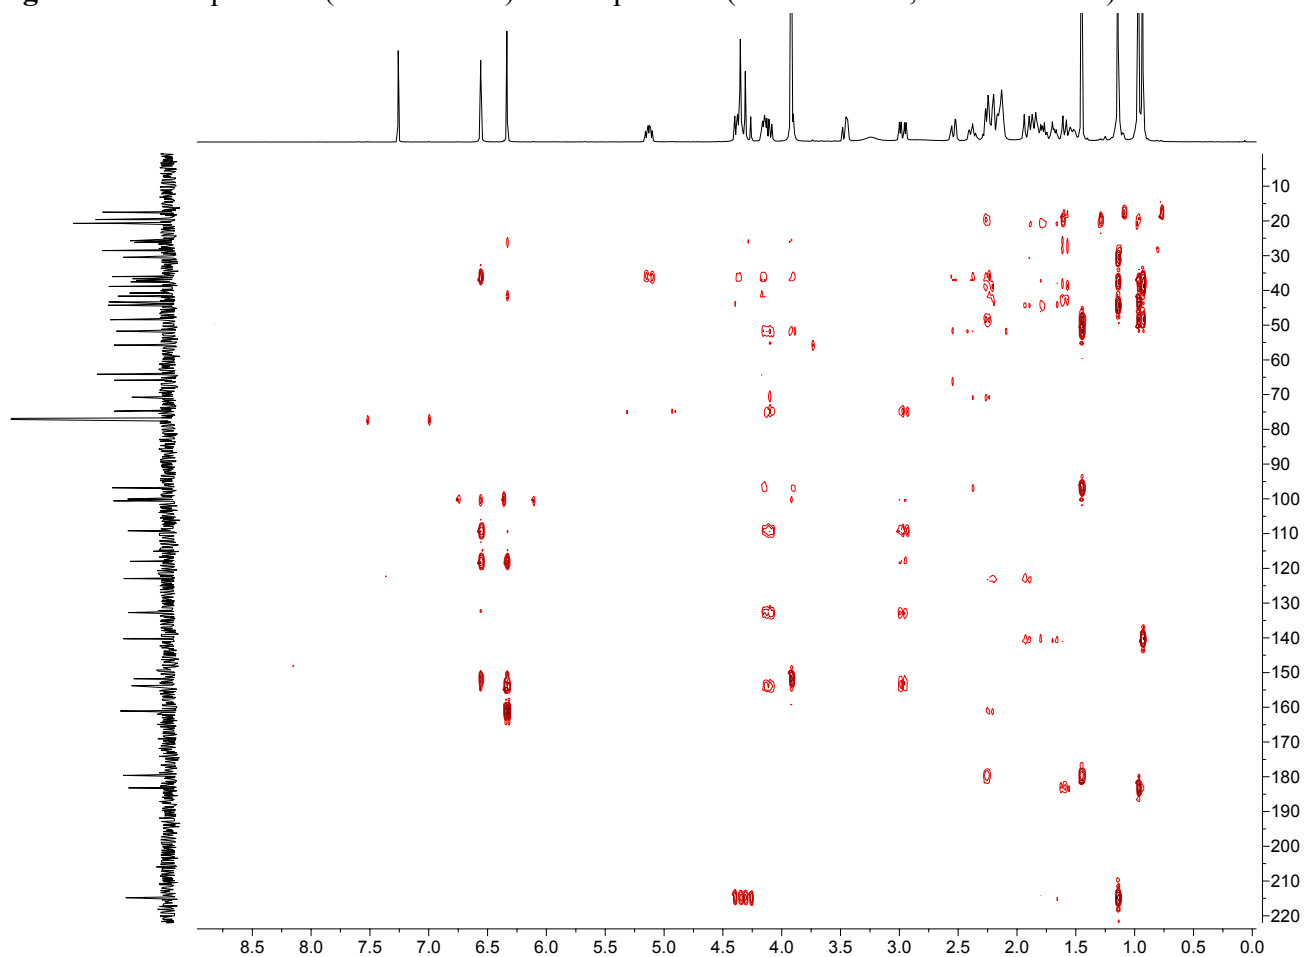

**Fig. S8** NOESY spectrum (400 MHz, chloroform-*d*) of compound **1**

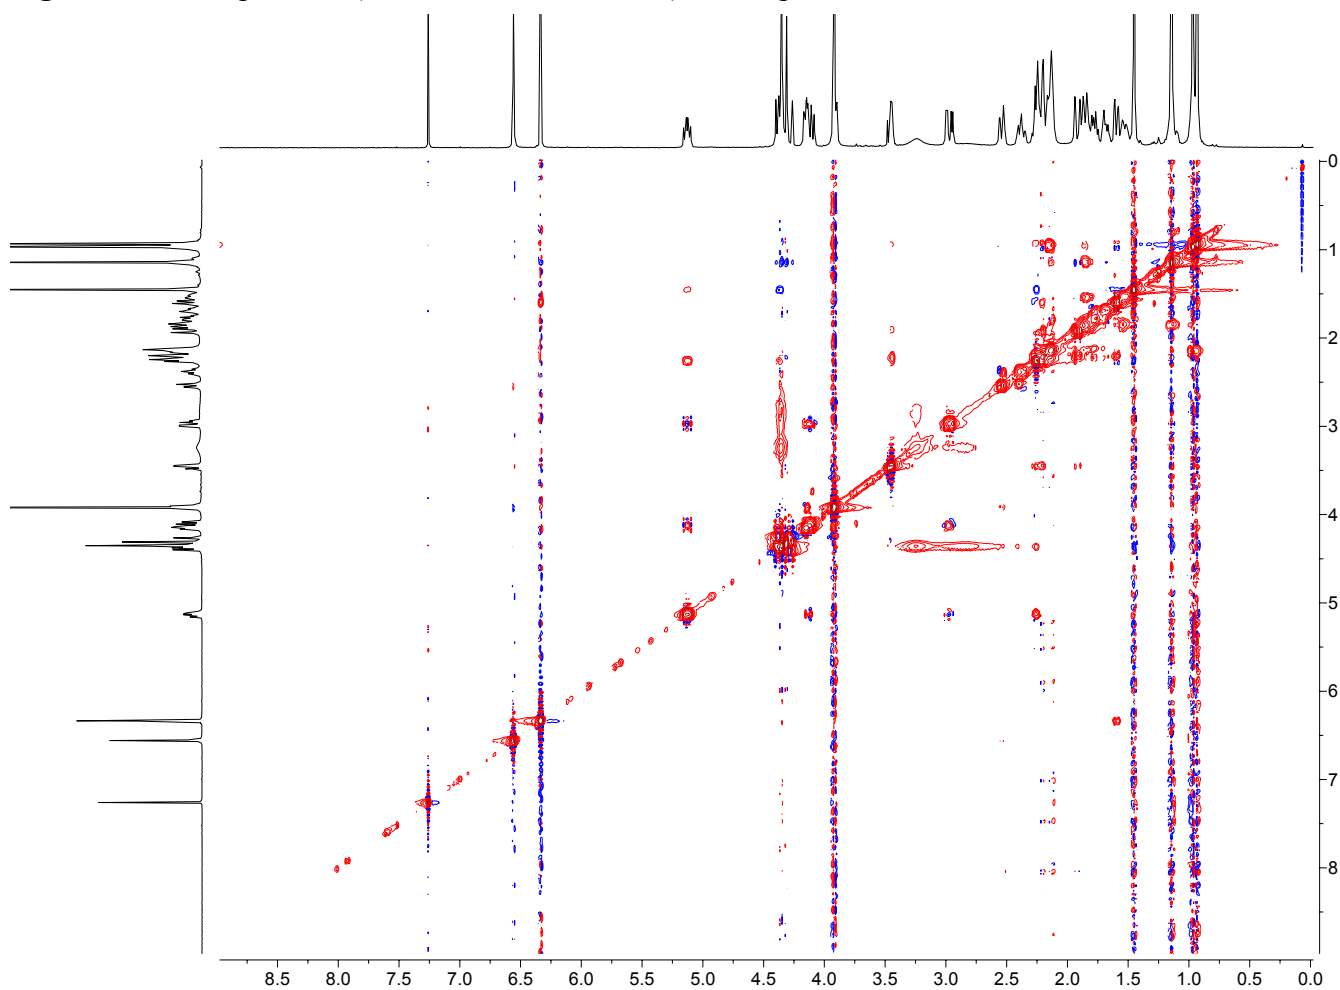

**Fig. S9** IR spectrum of compound **1**

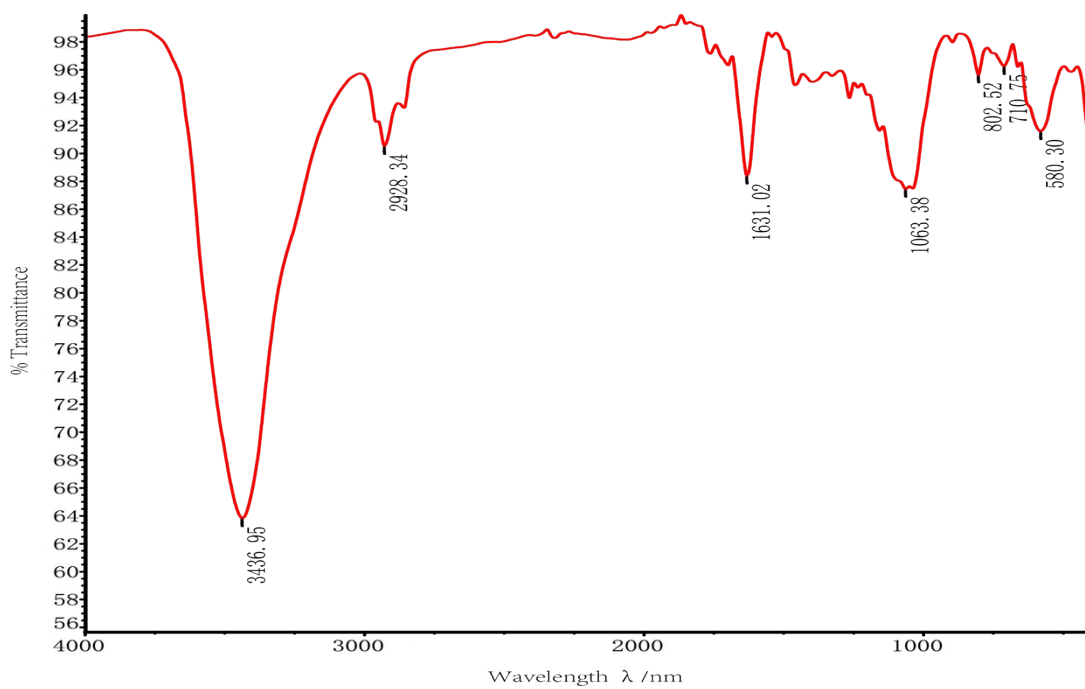



**Fig. S10** (+)-HR-ESI-MS spectrum of compound **1**

xumingming-20210109-19 218 (5.204)

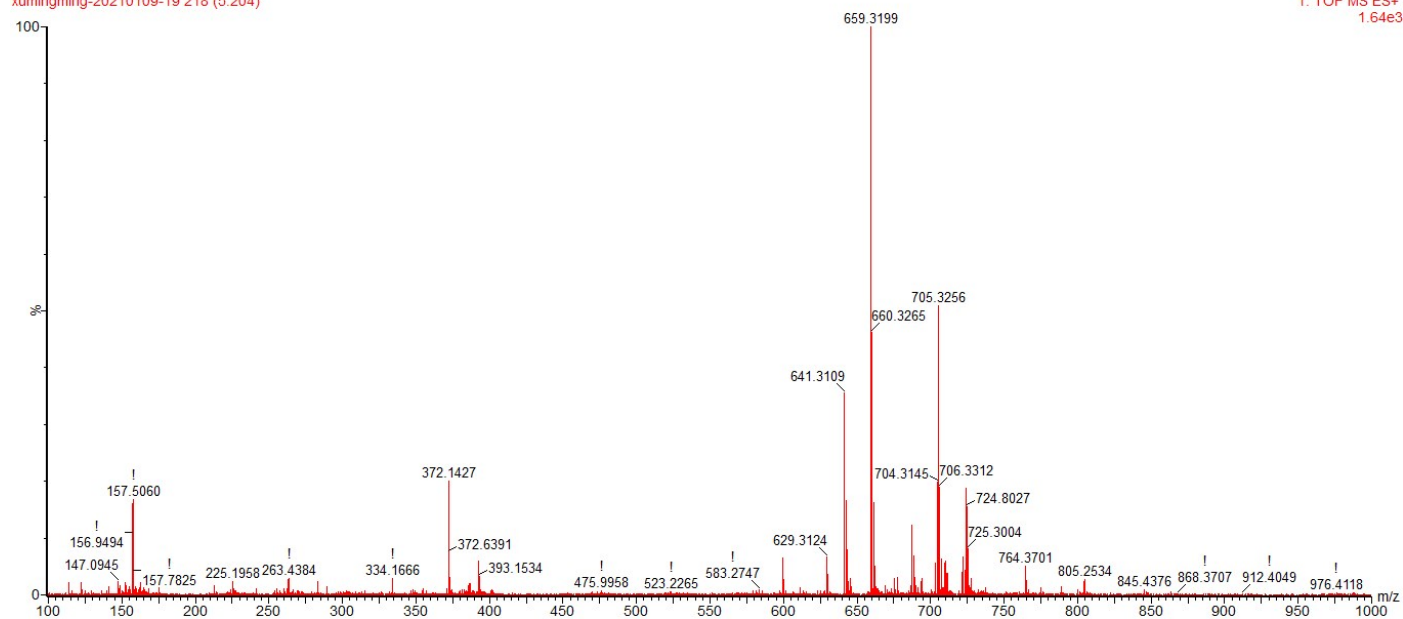

**Fig. S11** UV spectrum of compound **1**

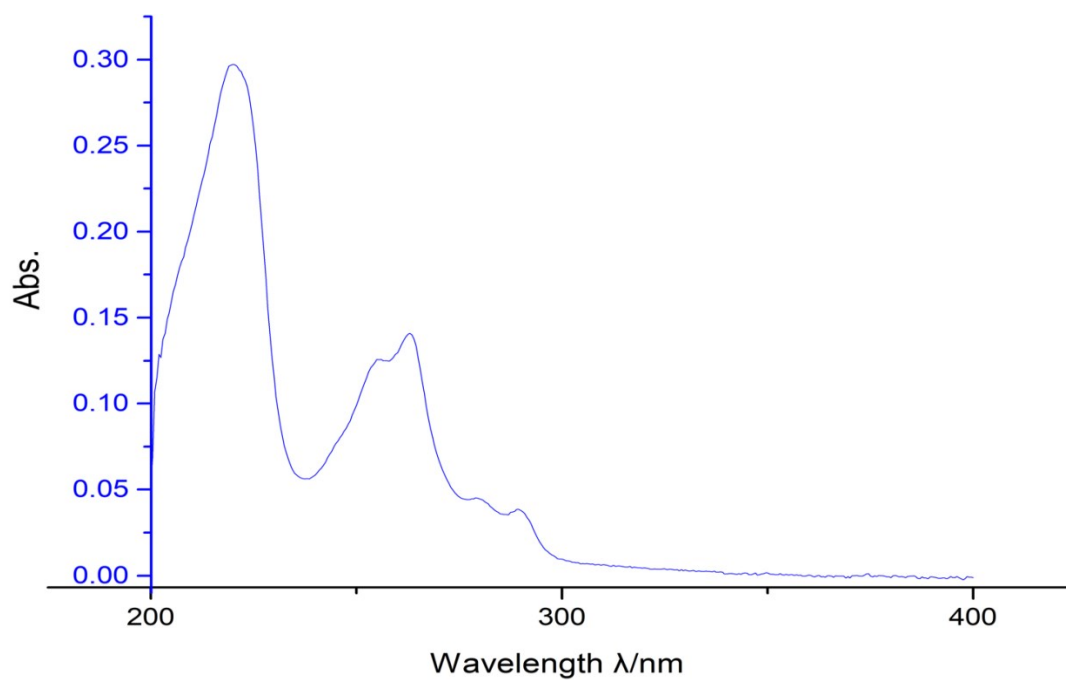

**Fig. S12**  $^1\text{H}$  NMR (500 MHz,  $\text{DMSO-}d_6$ ) spectrum of compound **2**

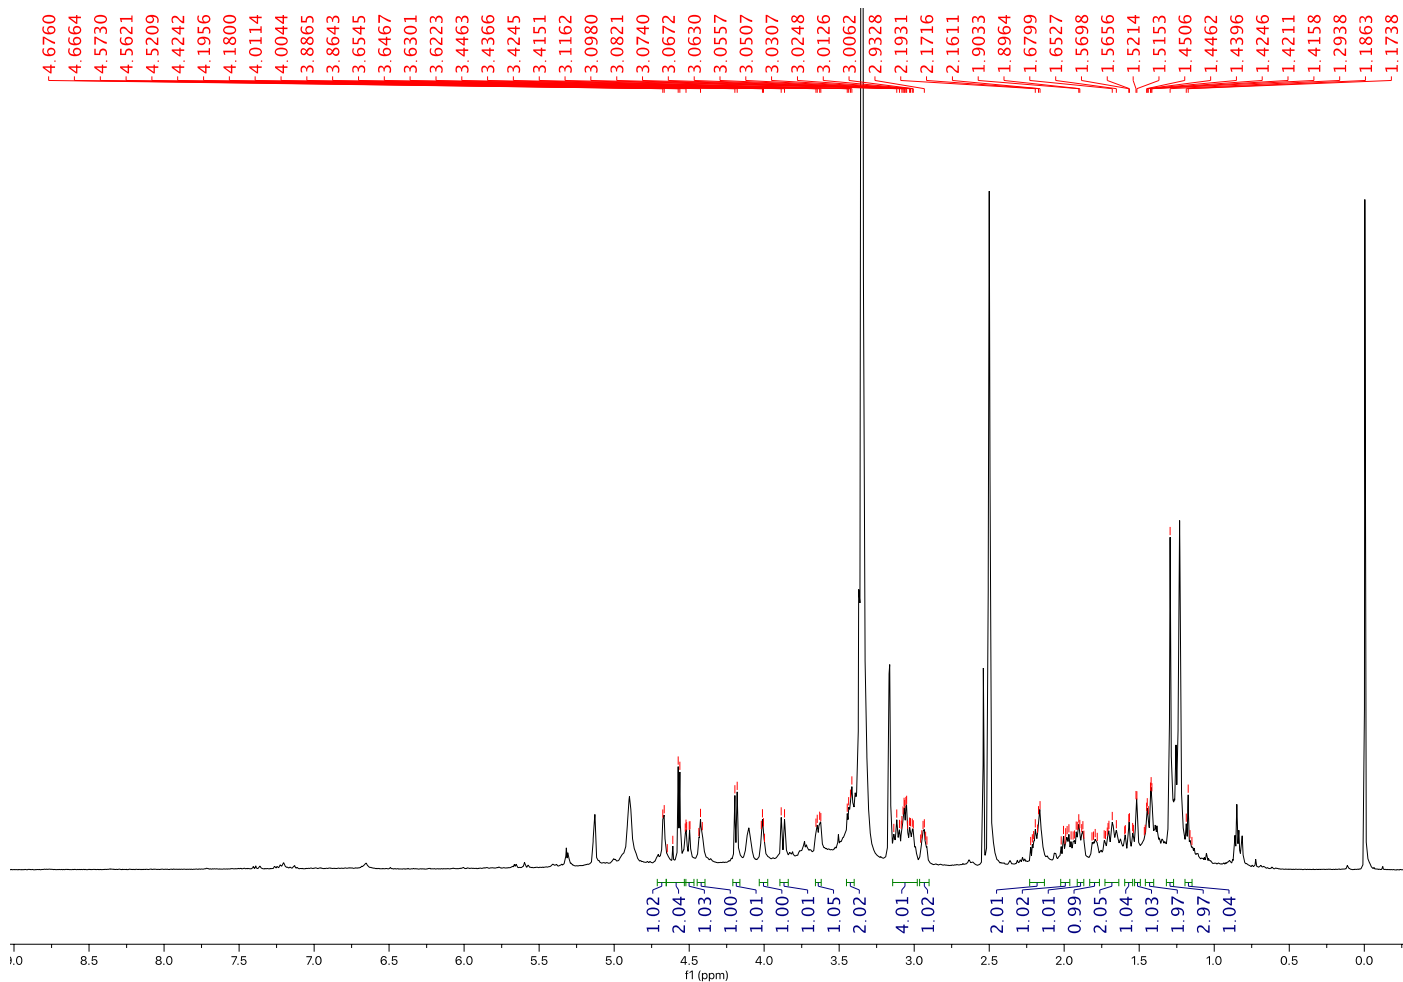

**Fig. S13**  $^{13}\text{C}$  NMR (125 MHz,  $\text{DMSO-}d_6$ ) spectrum of compound **2**

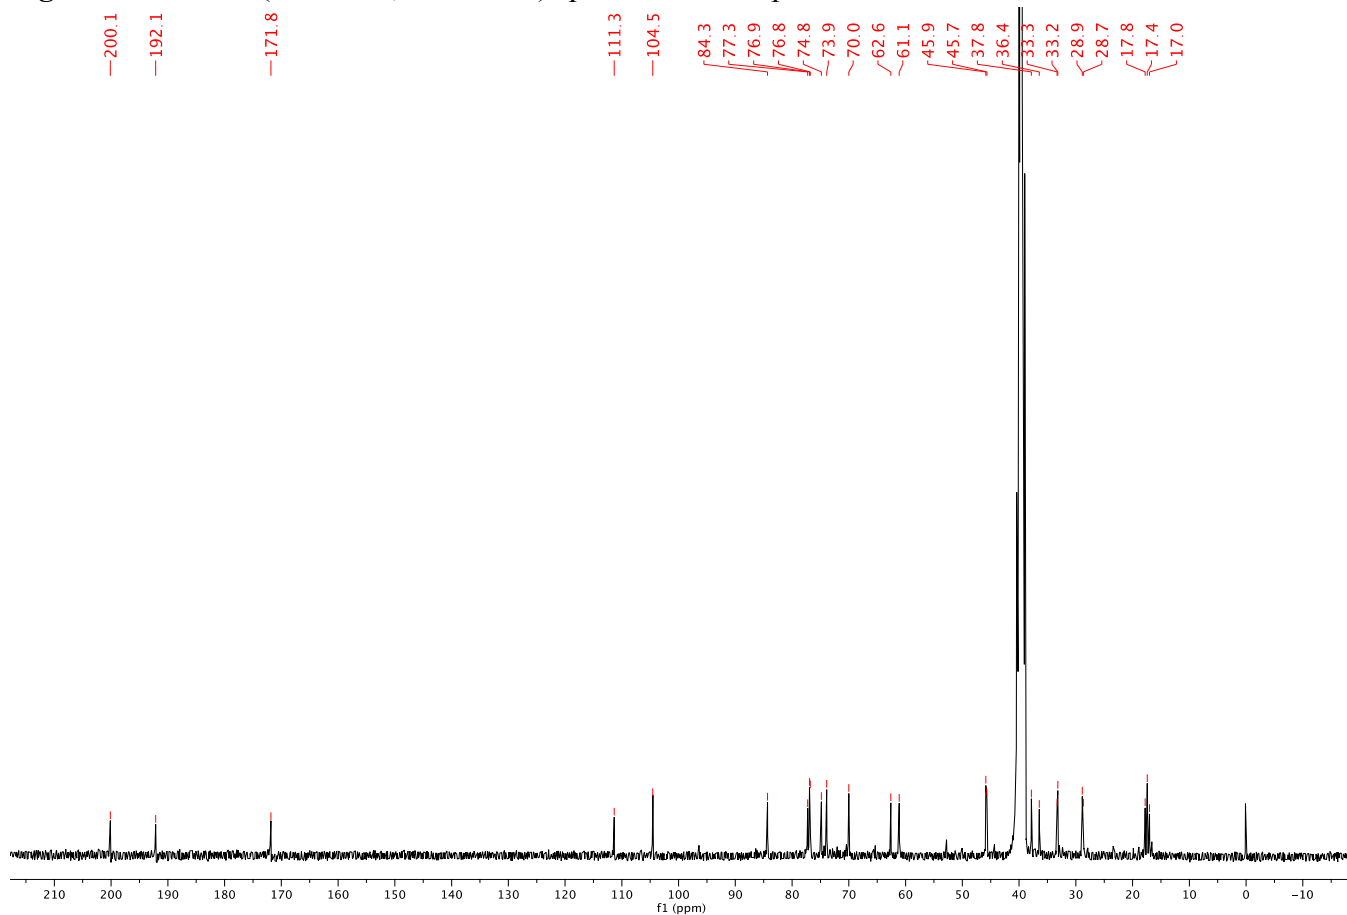

**Fig. S14** DEPT135 (125 MHz, DMSO-*d*<sub>6</sub>) spectrum of compound **2**

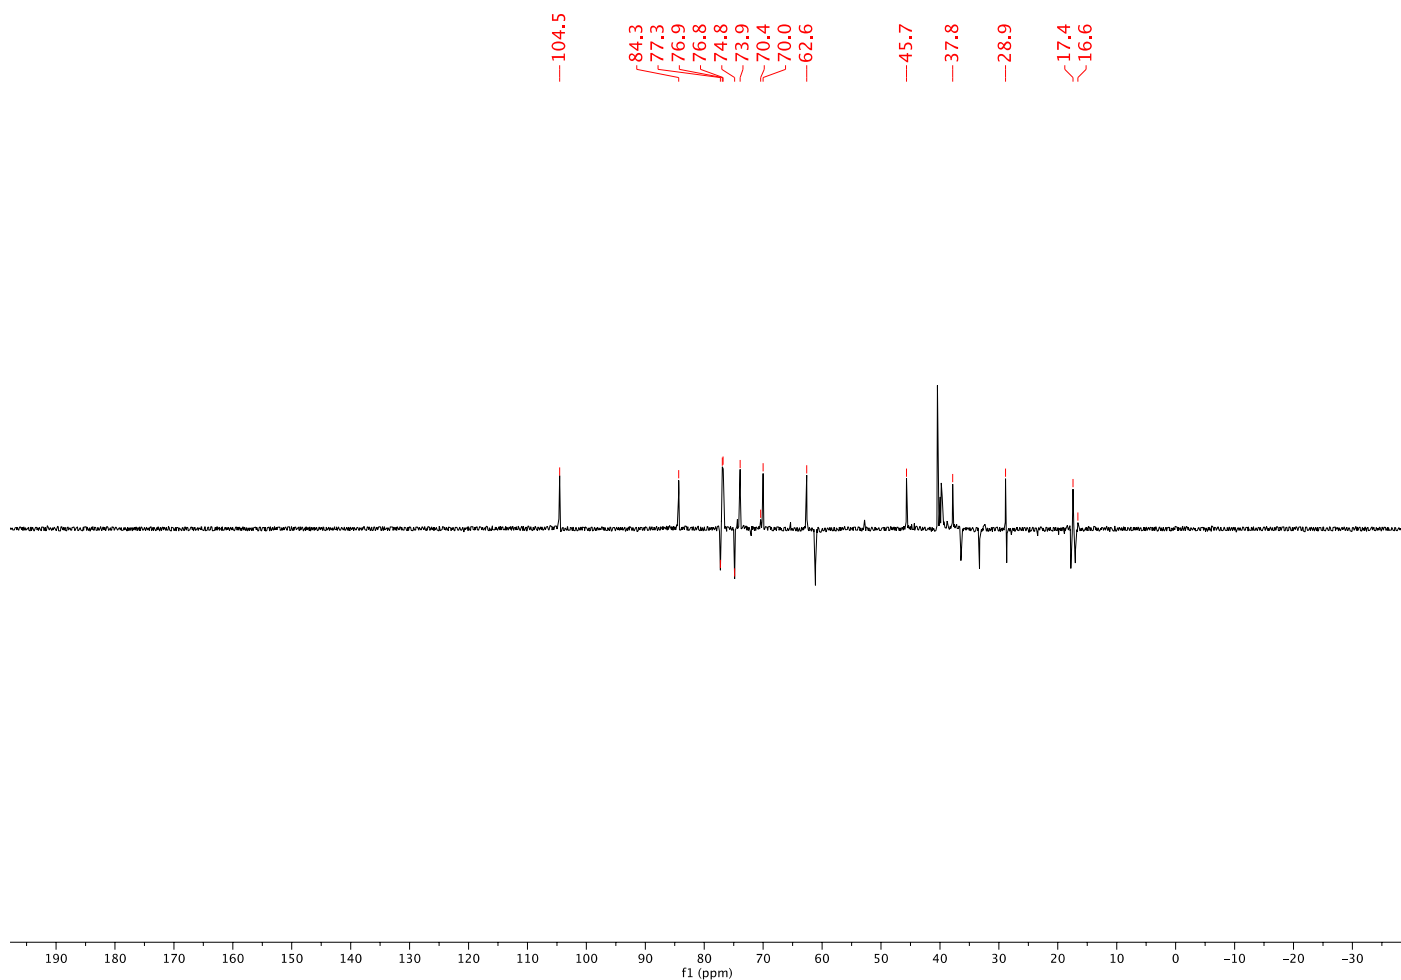

**Fig. S15** <sup>1</sup>H-<sup>1</sup>H COSY spectrum (500 MHz, DMSO-*d*<sub>6</sub>) of compound **2**

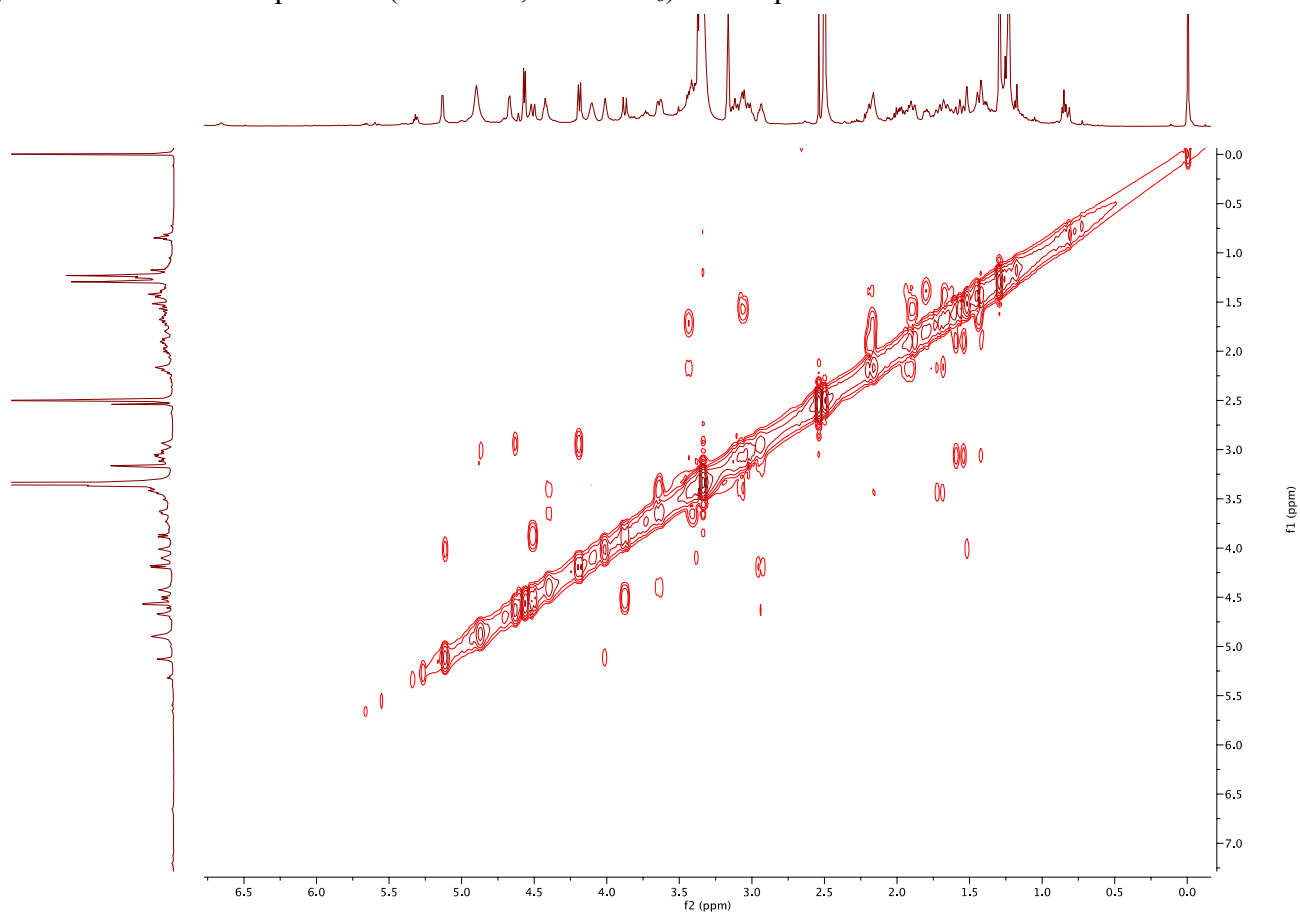

**Fig. S16** HSQC spectrum (DMSO-*d*<sub>6</sub>) of compound **2** (<sup>1</sup>H: 500 MHz, <sup>13</sup>C: 125 MHz)

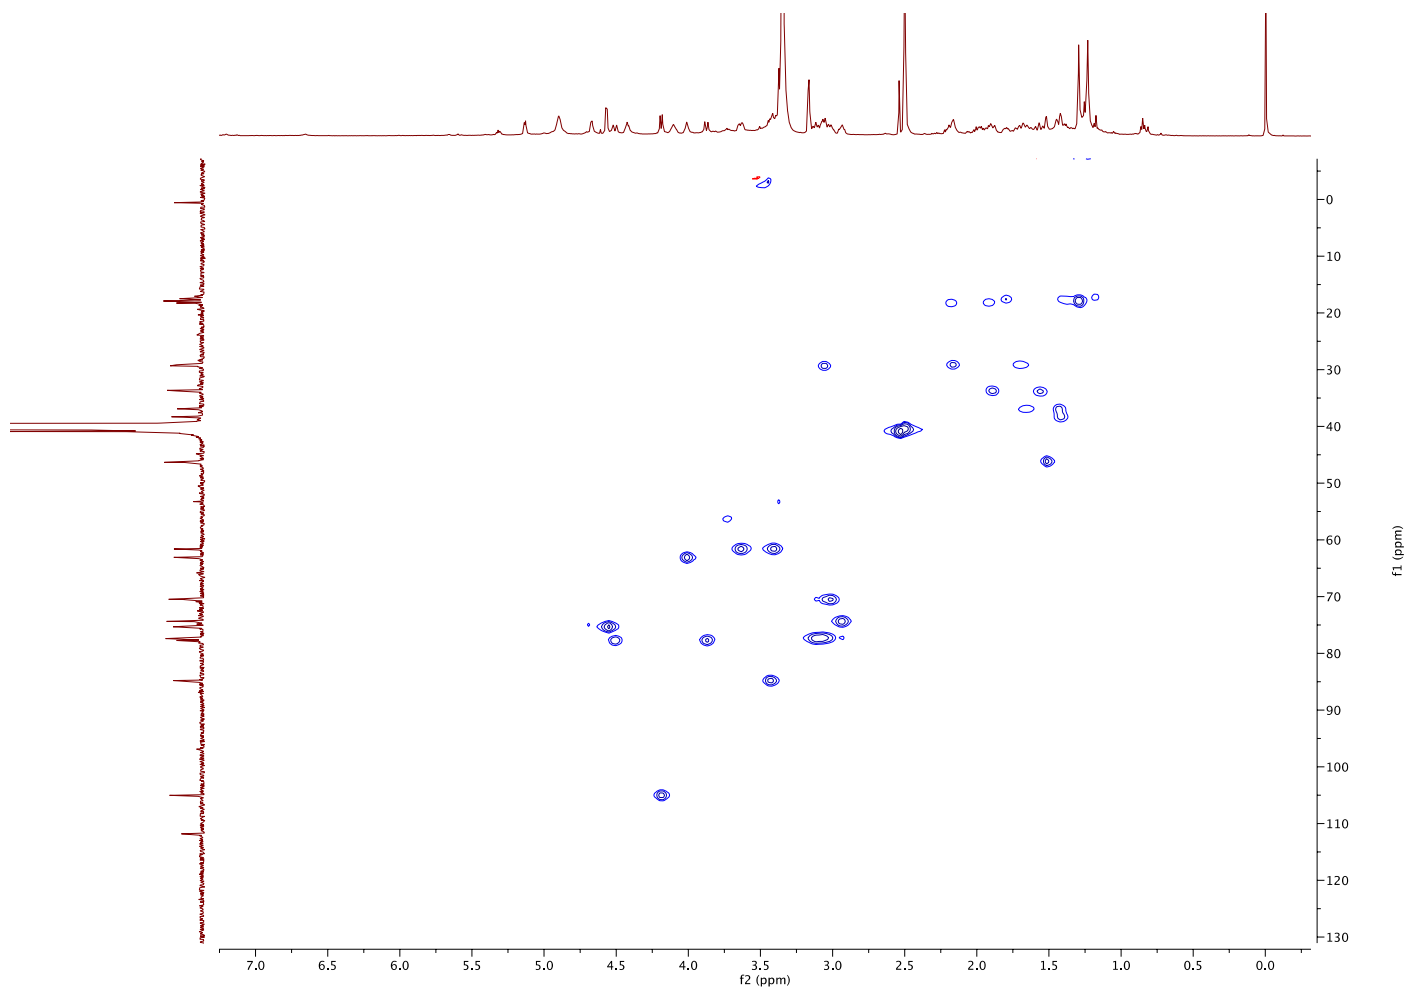

**Fig. S17** HMBC spectrum (DMSO-*d*<sub>6</sub>) of compound **2** (<sup>1</sup>H: 500 MHz, <sup>13</sup>C: 125 MHz)

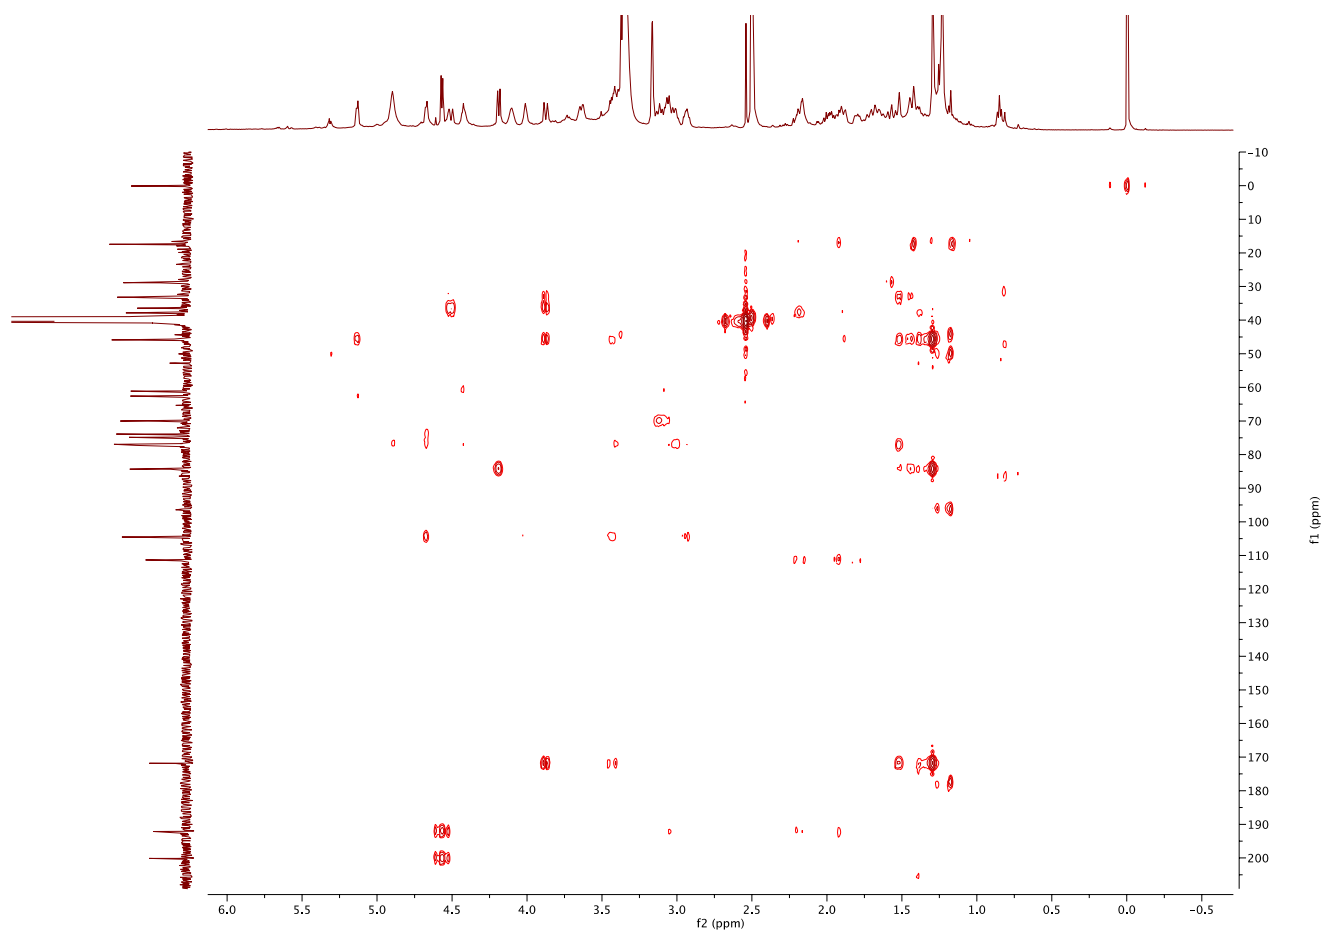

**Fig. S18** NOESY spectrum (500 MHz, DMSO- $d_6$ ) of compound **2**

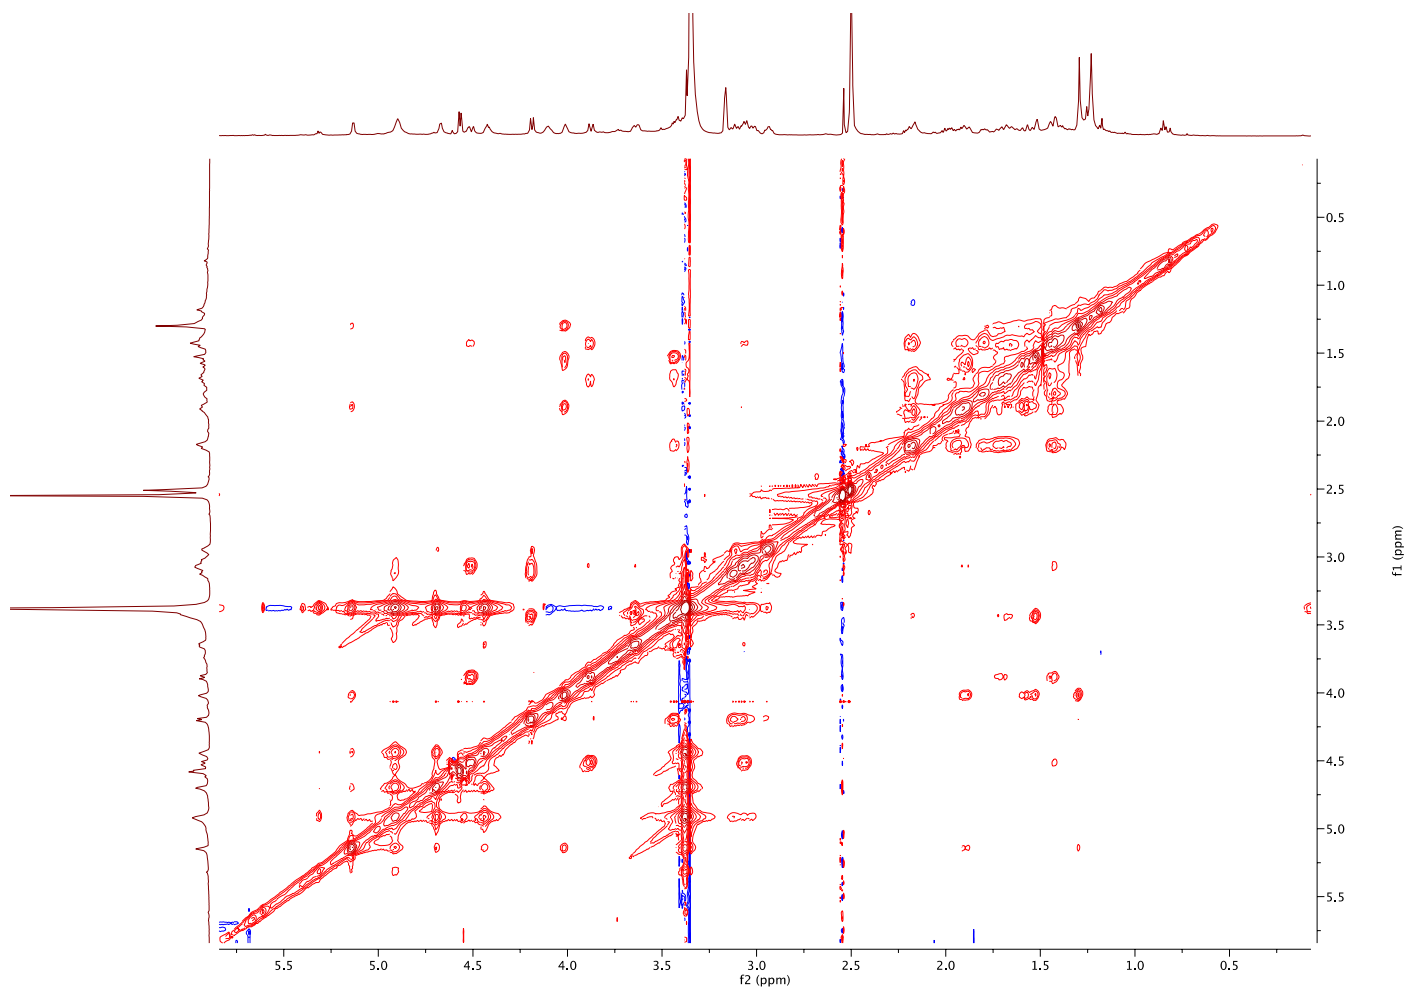

**Fig. S19** IR spectrum of compound **2**

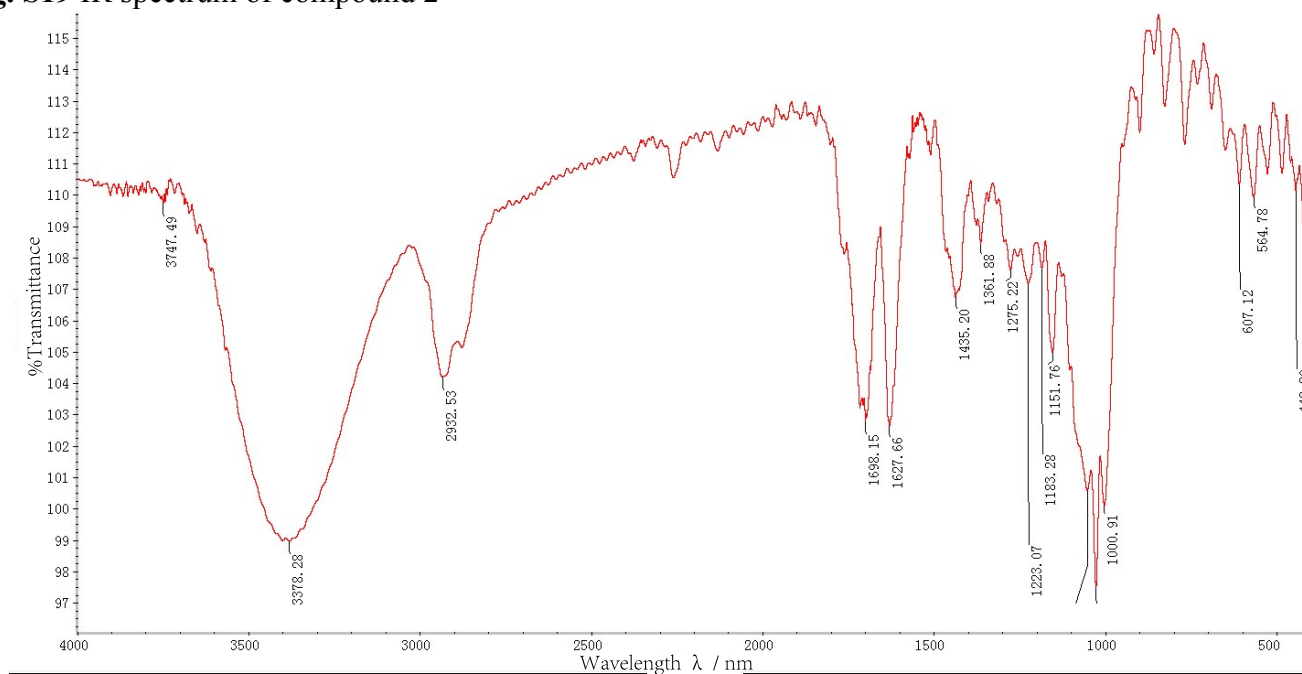

**Fig. S20** (-)-HR-ESI-MS spectrum of compound **2**

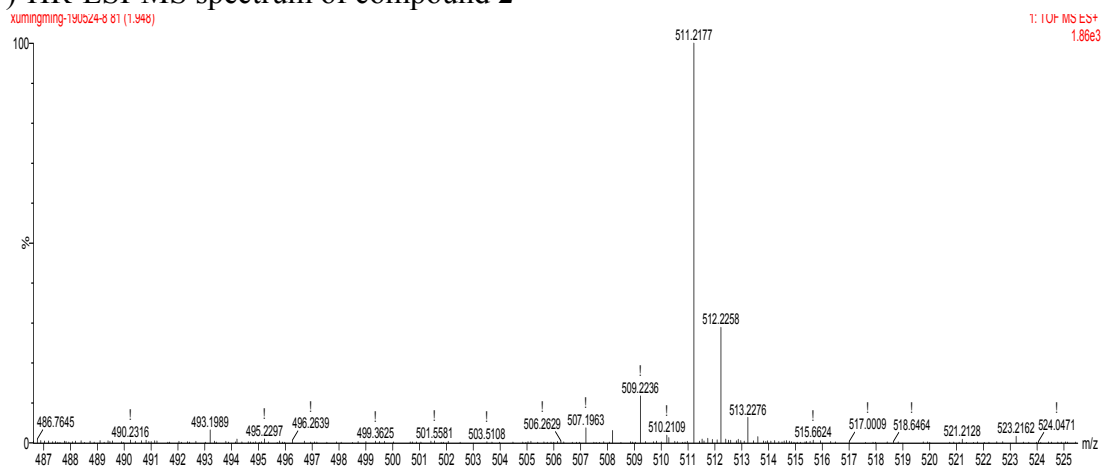

**Fig. S21** UV spectrum of compound **2**

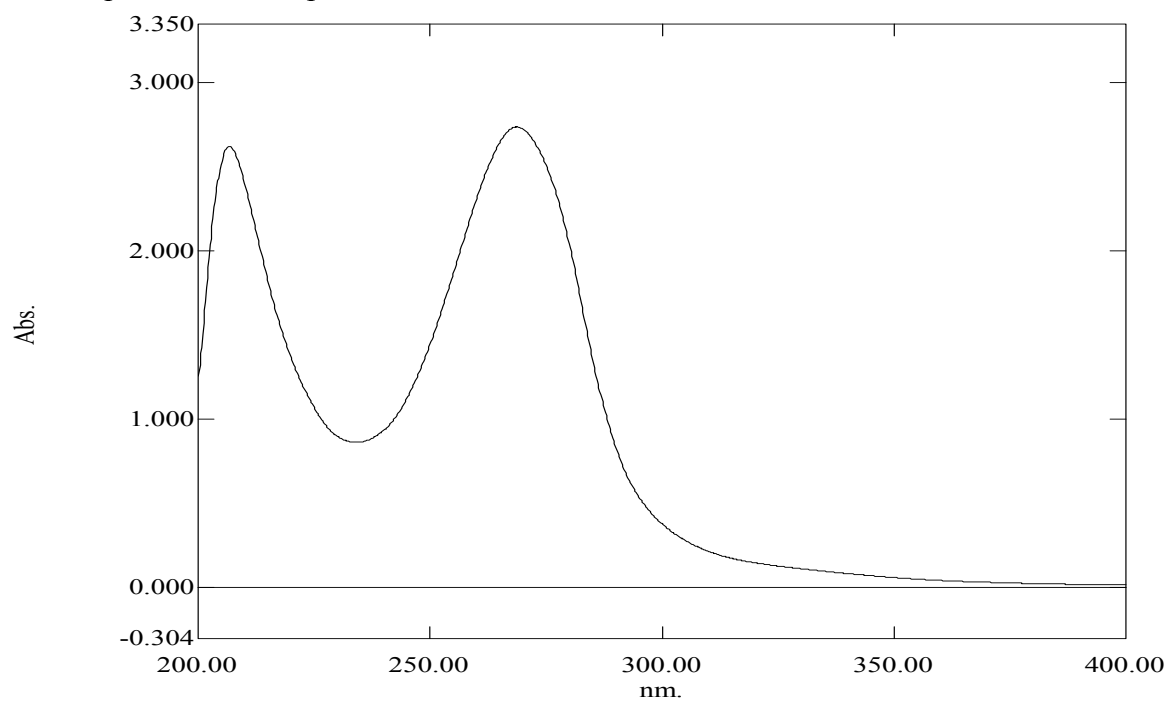

**Fig. S22**  $^1\text{H}$  NMR (500 MHz,  $\text{DMSO-}d_6$ ) spectrum of compound **3**

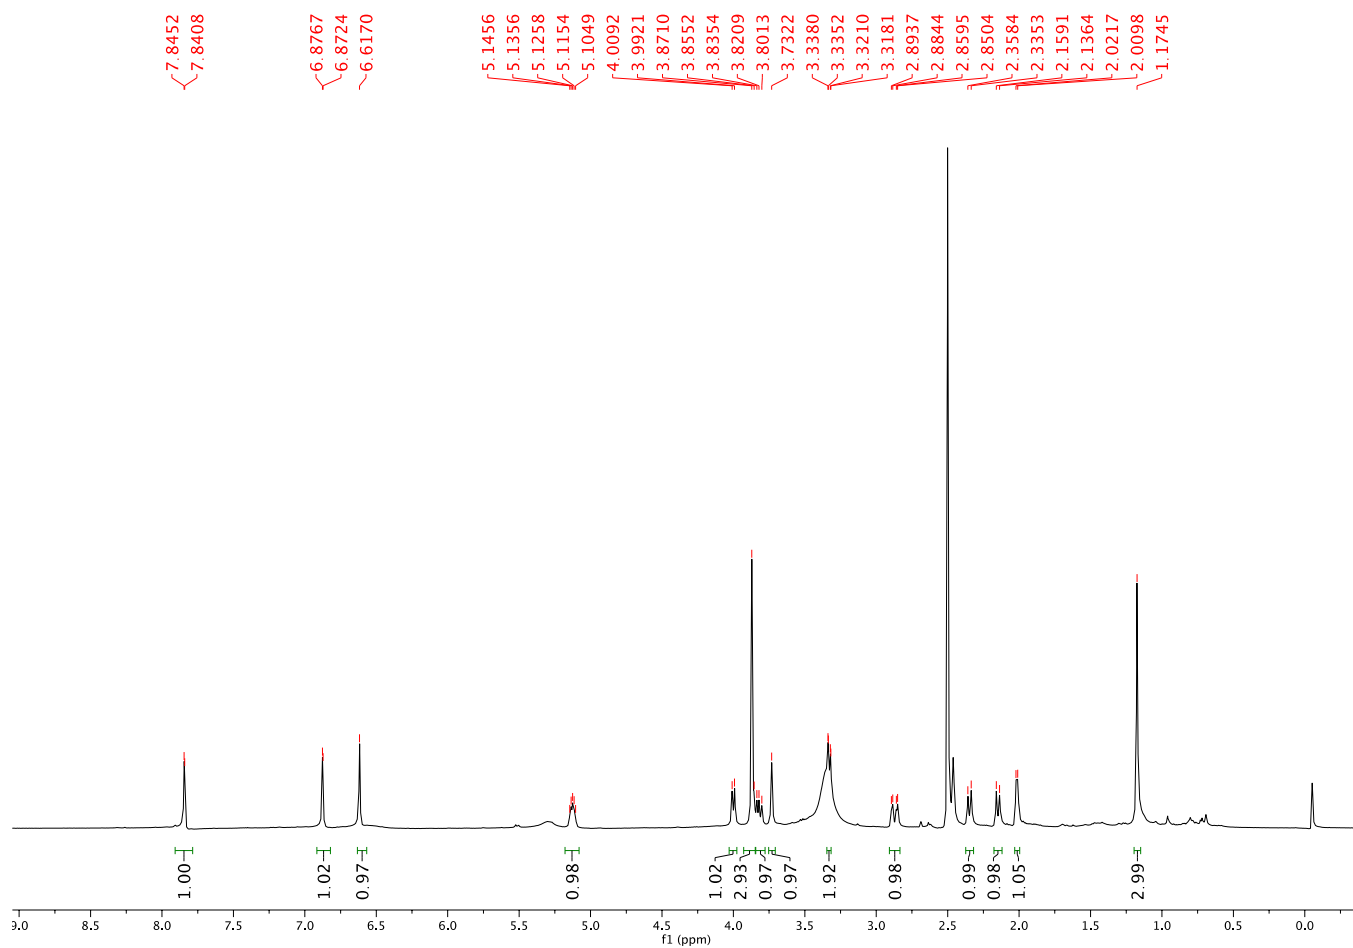

**Fig. S23**  $^{13}\text{C}$  NMR (125 MHz,  $\text{DMSO-}d_6$ ) spectrum of compound **3**

IT-18-2.1.fid

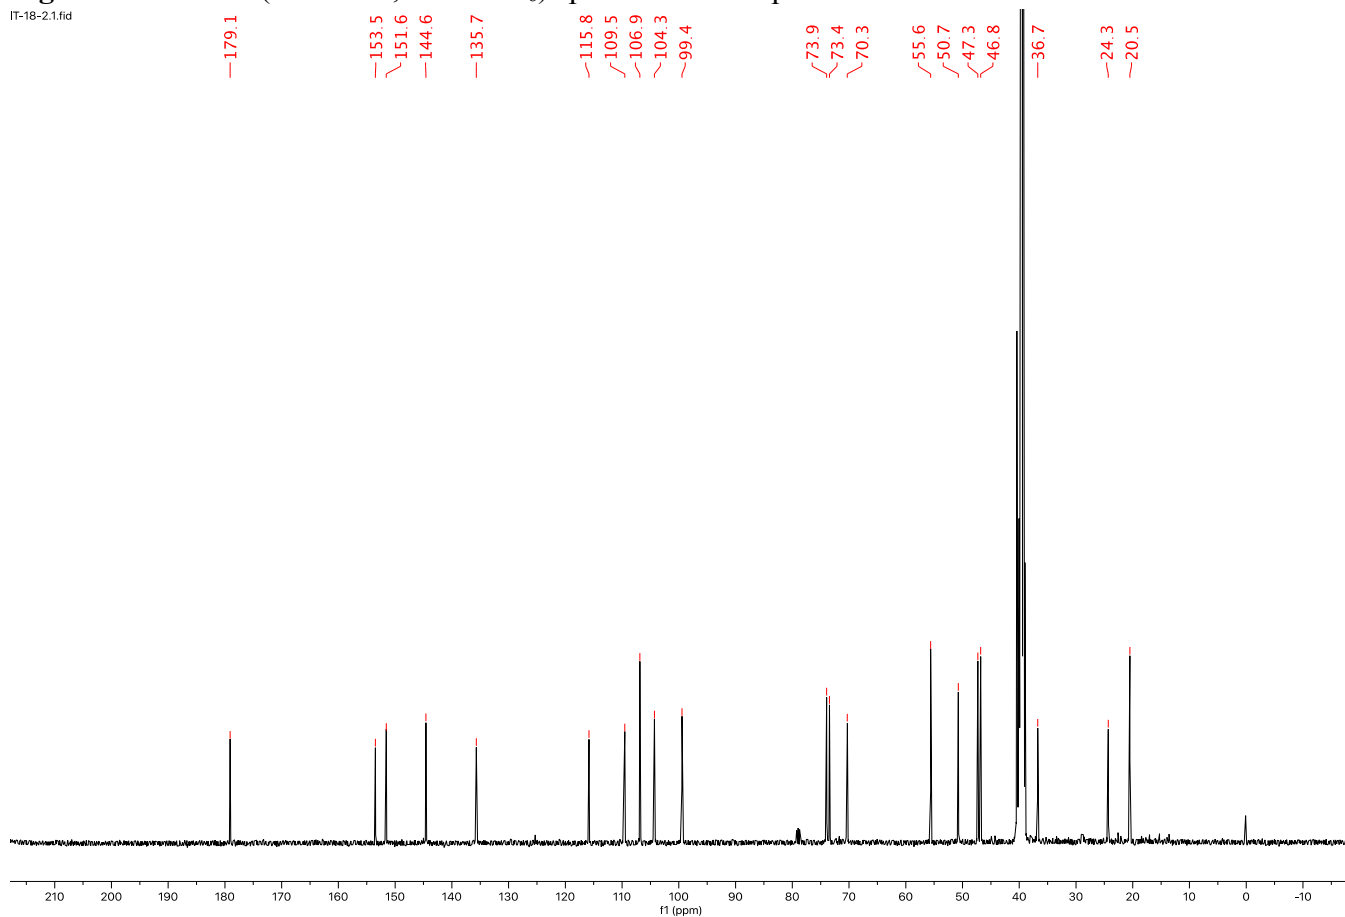

**Fig. S24**  $^1\text{H}$  NMR (500 MHz,  $\text{CD}_3\text{OD}-d_4$ ) spectrum of compound **4**

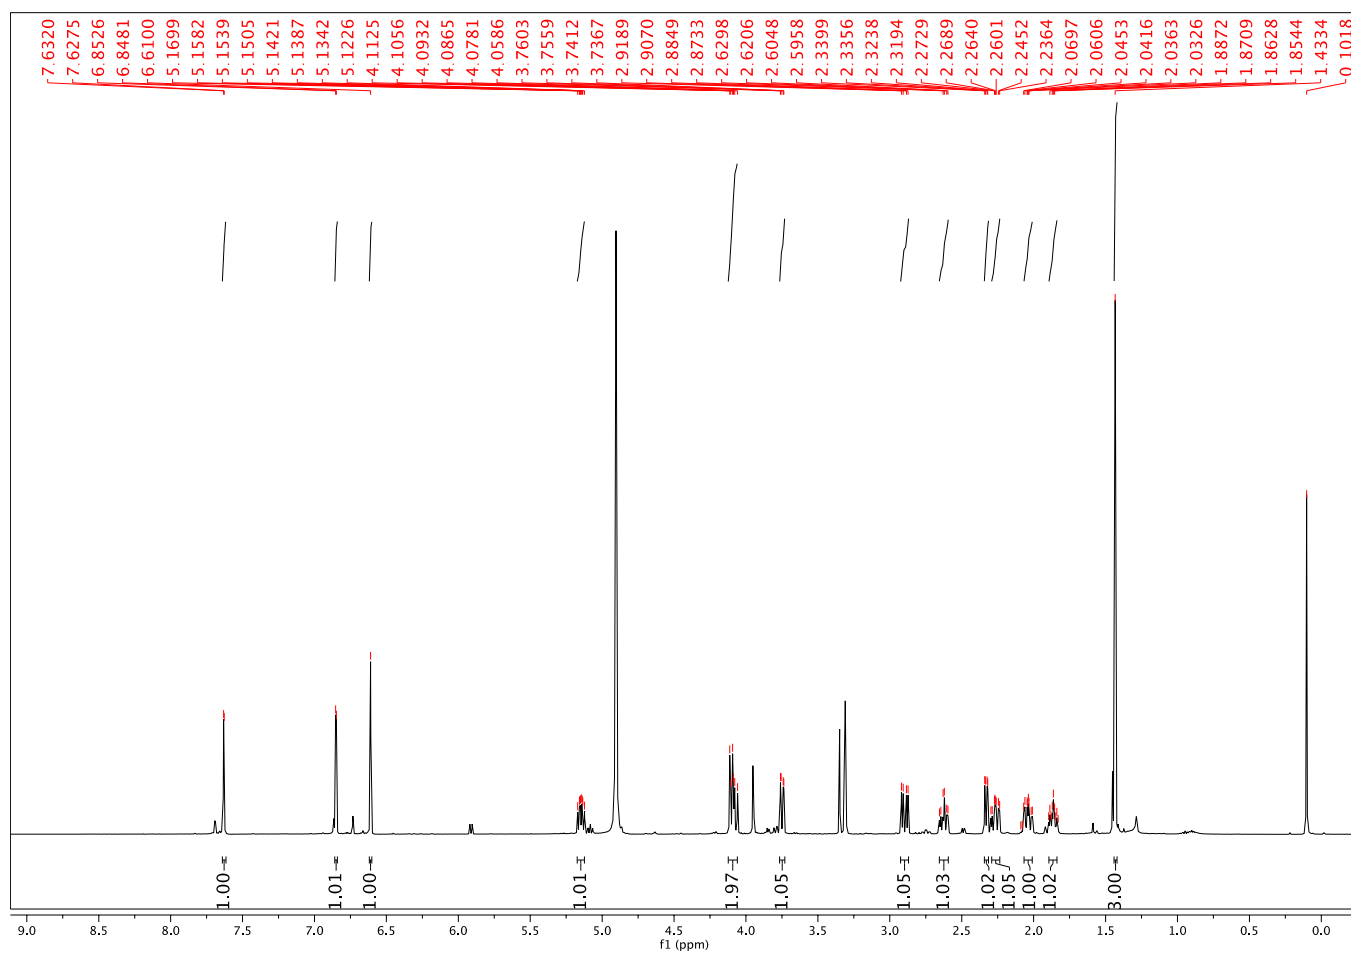

**Fig. S25**  $^{13}\text{C}$  NMR (125 MHz,  $\text{CD}_3\text{OD}-d_4$ ) spectrum of compound **4**

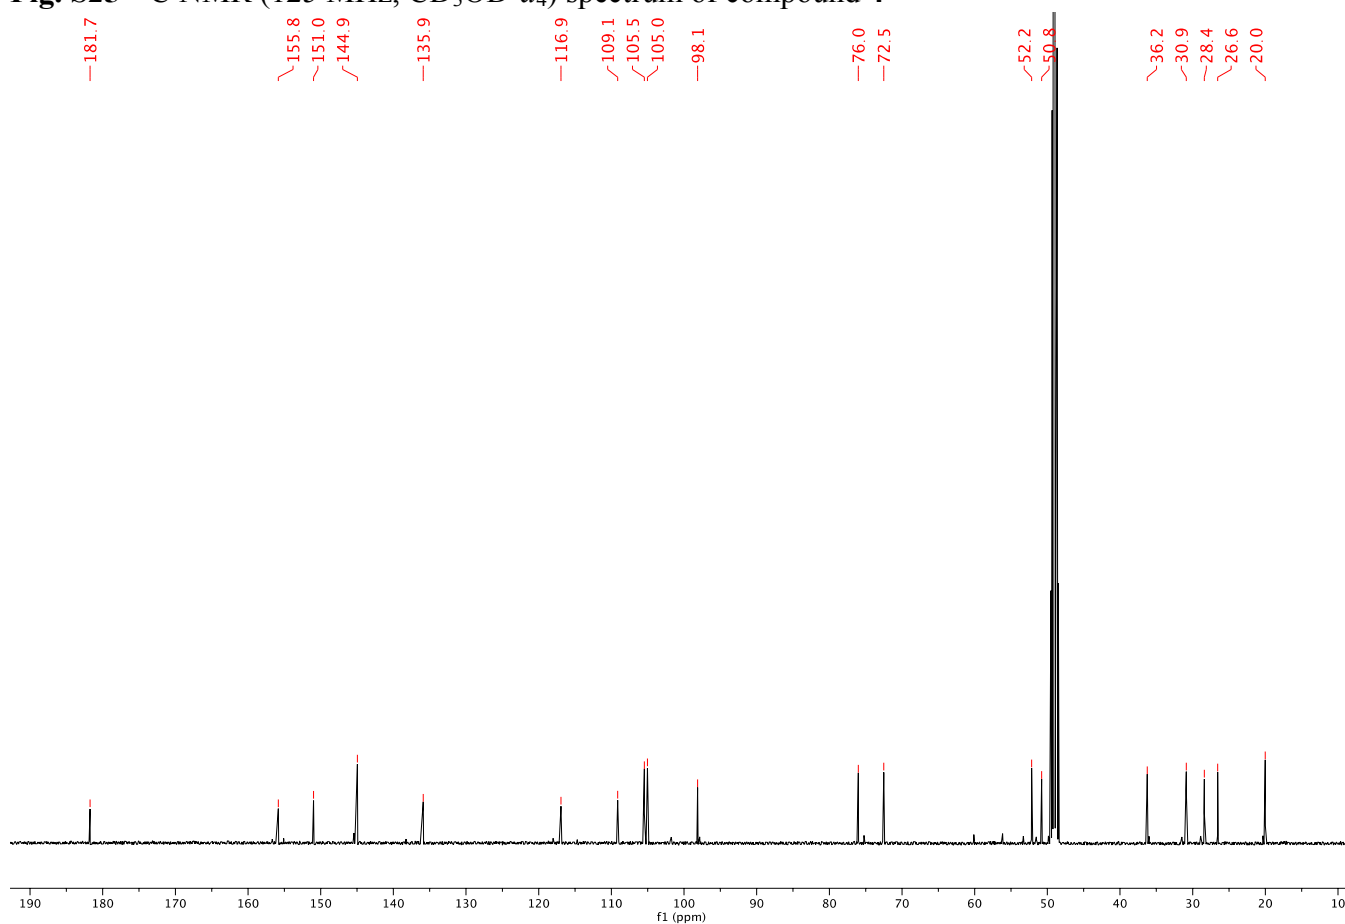



**Fig. S26**  $^1\text{H}$  NMR (500 MHz,  $\text{DMSO-}d_6$ ) spectrum of compound **5**

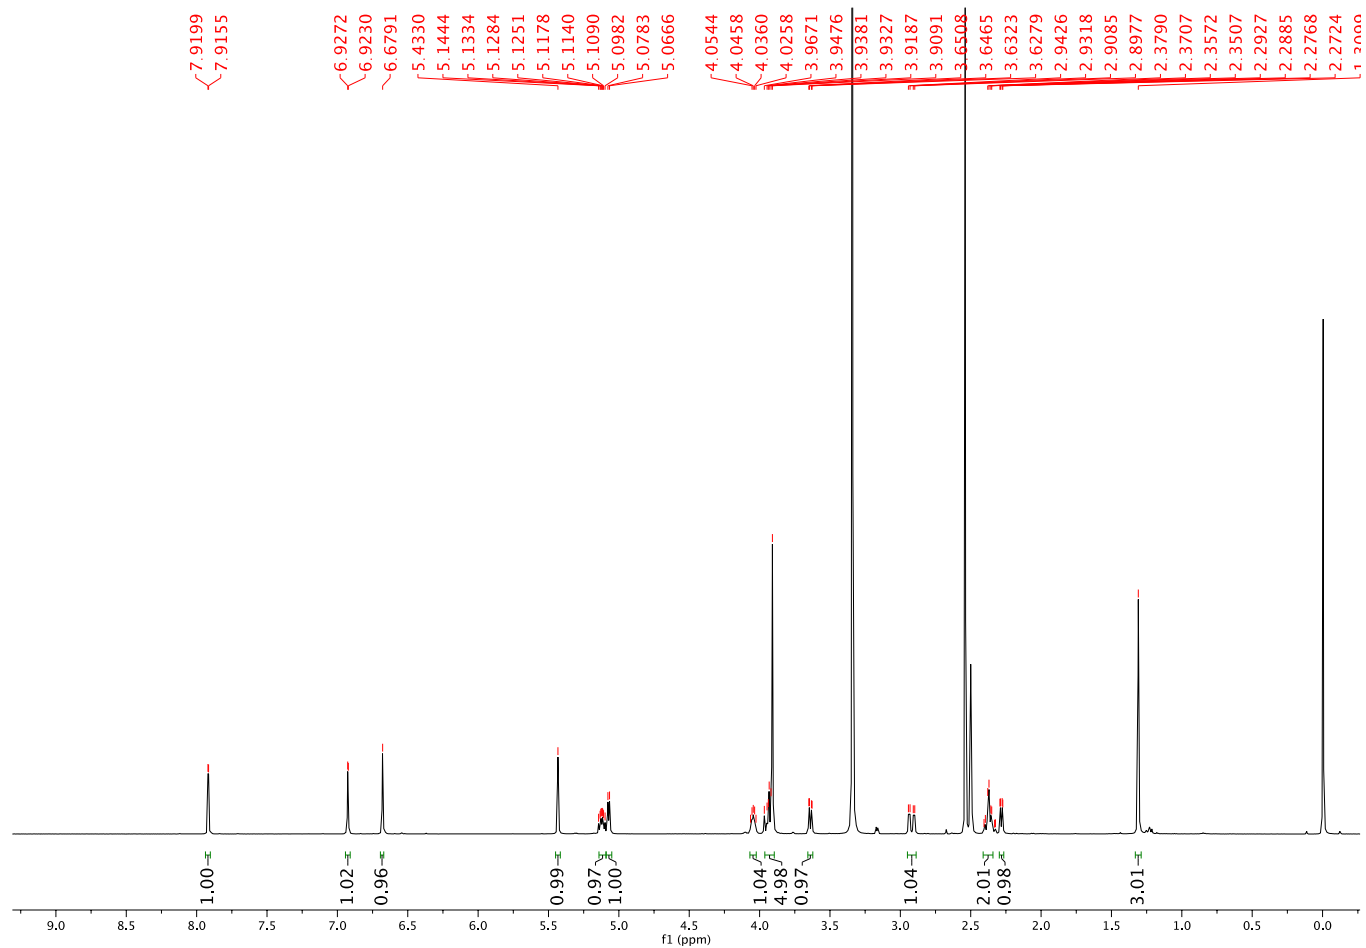

**Fig. S27**  $^{13}\text{C}$  NMR (125 MHz,  $\text{DMSO-}d_6$ ) spectrum of compound **5**

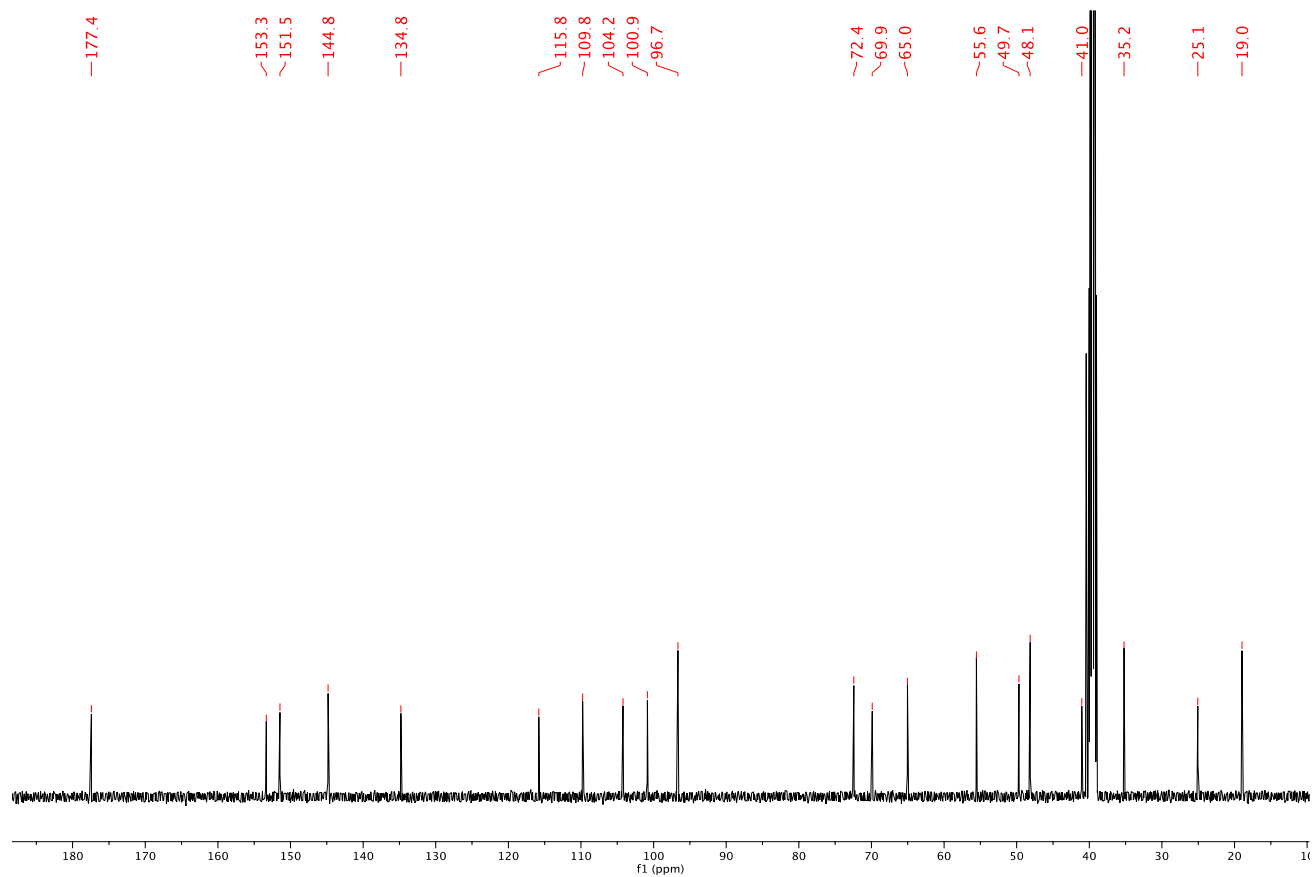

**Fig. S28**  $^1\text{H}$  NMR (500 MHz,  $\text{DMSO-}d_6$ ) spectrum of compound **6**

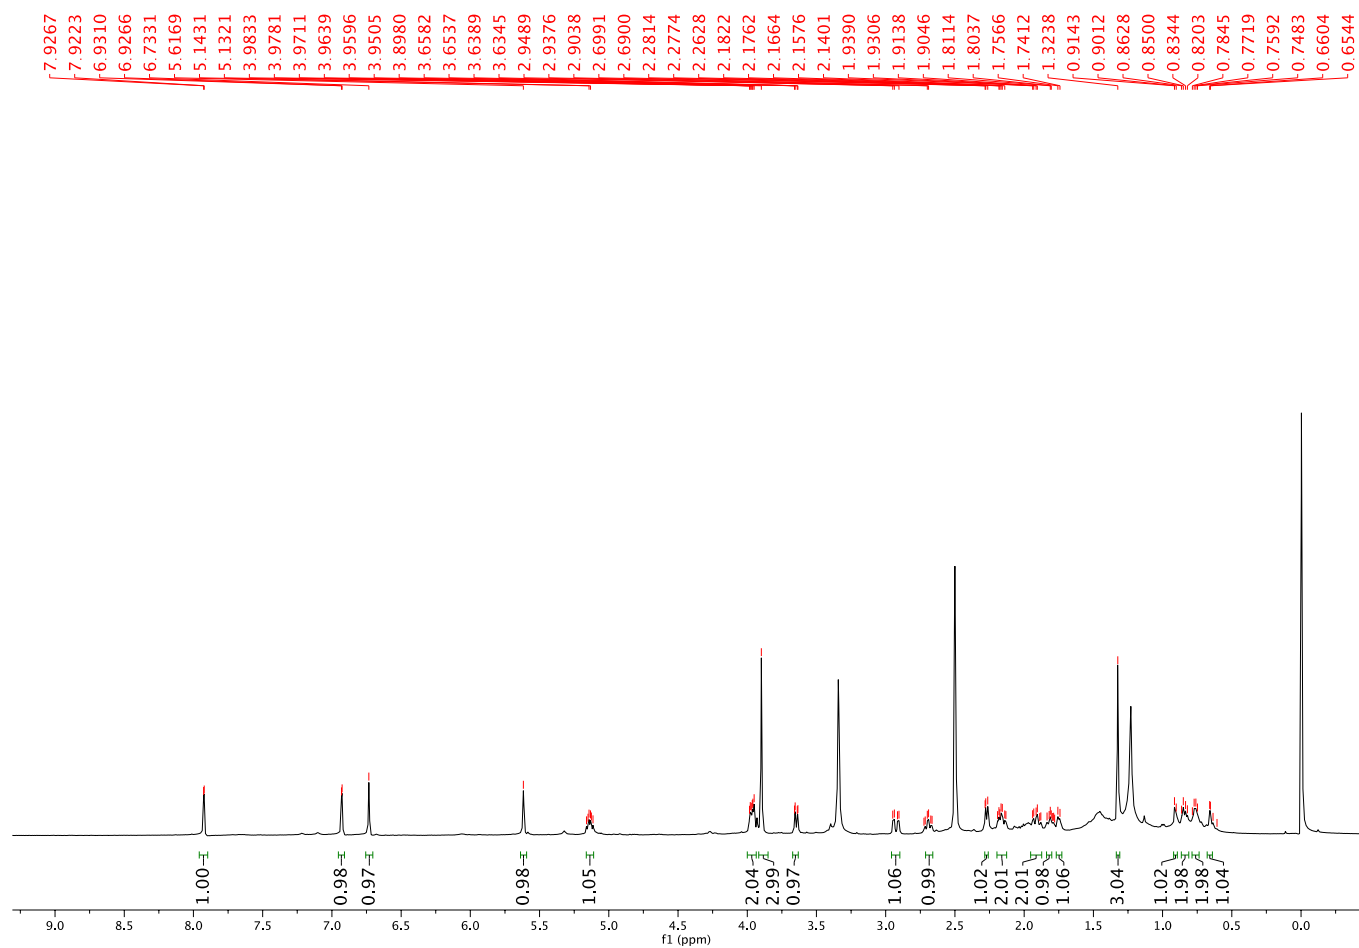

**Fig. S29**  $^{13}\text{C}$  NMR (125 MHz,  $\text{DMSO-}d_6$ ) spectrum of compound **6**

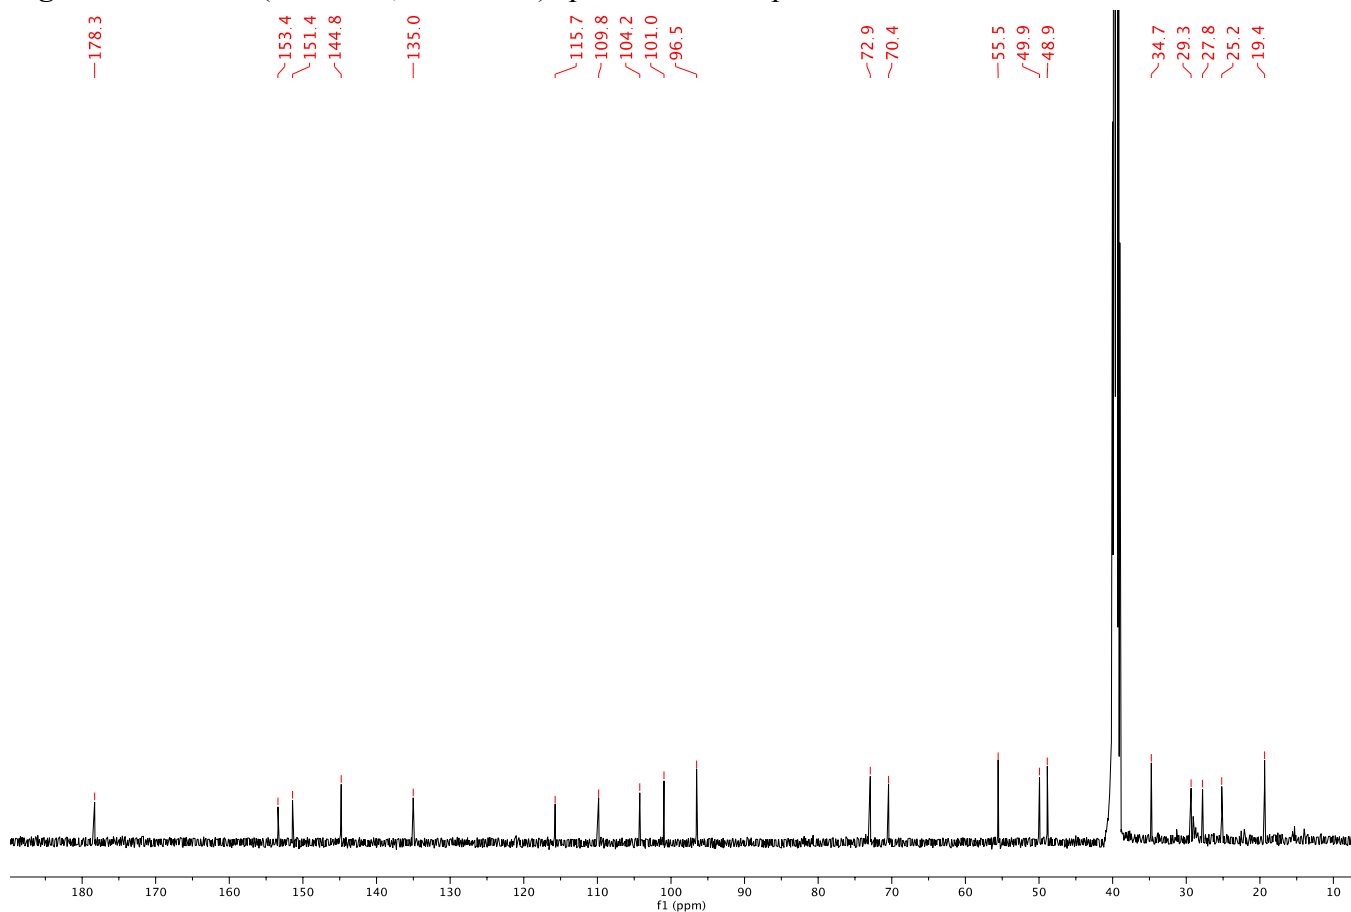

**Fig. S30**  $^1\text{H}$  NMR (500 MHz, Pyridine- $d_5$ ) spectrum of compound **7**

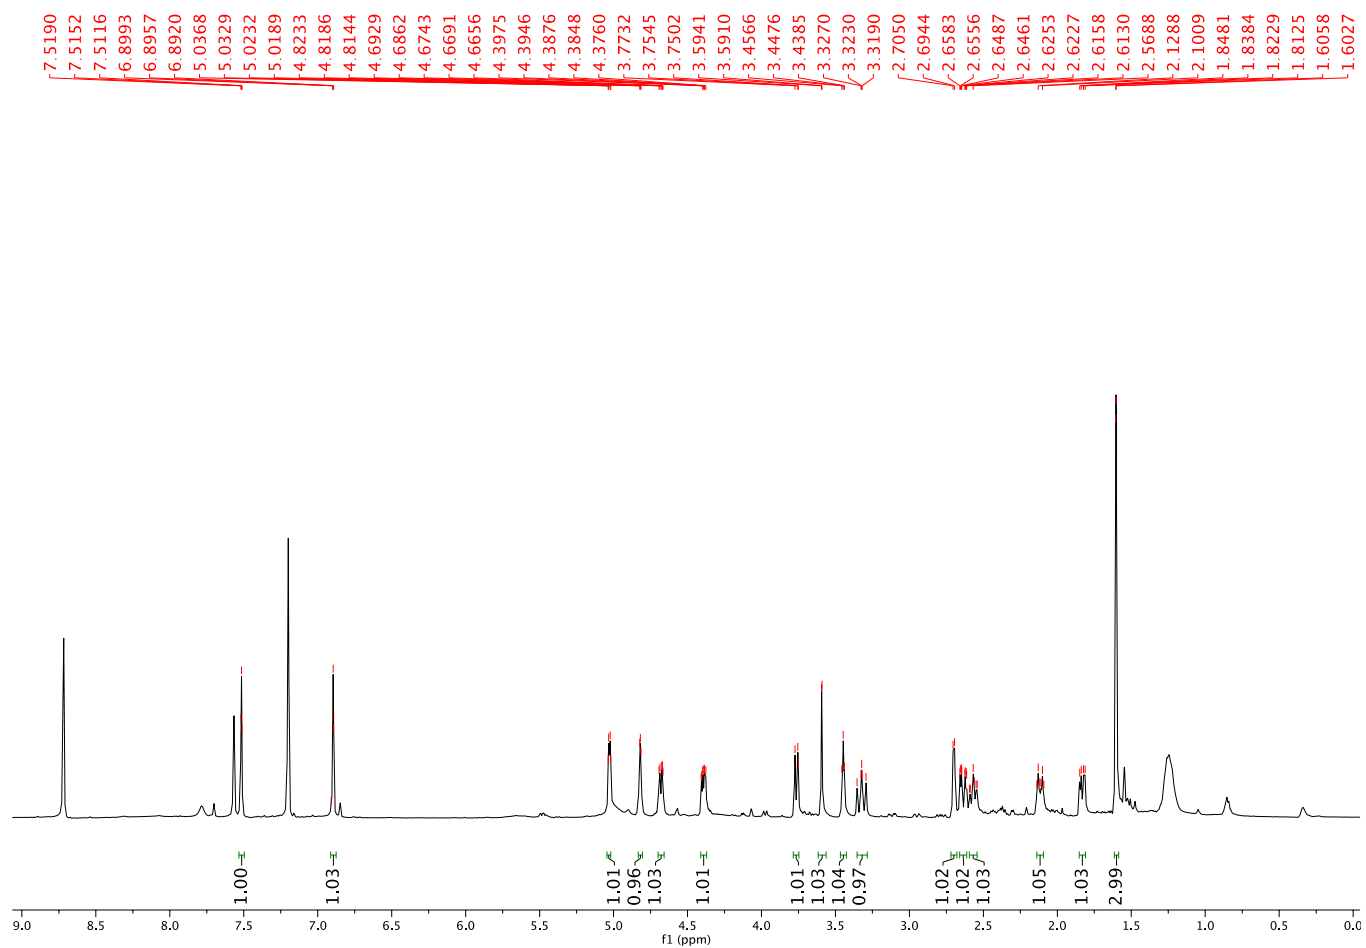

**Fig. S31**  $^{13}\text{C}$  NMR (125 MHz, pyridine- $d_5$ ) spectrum of compound **7**

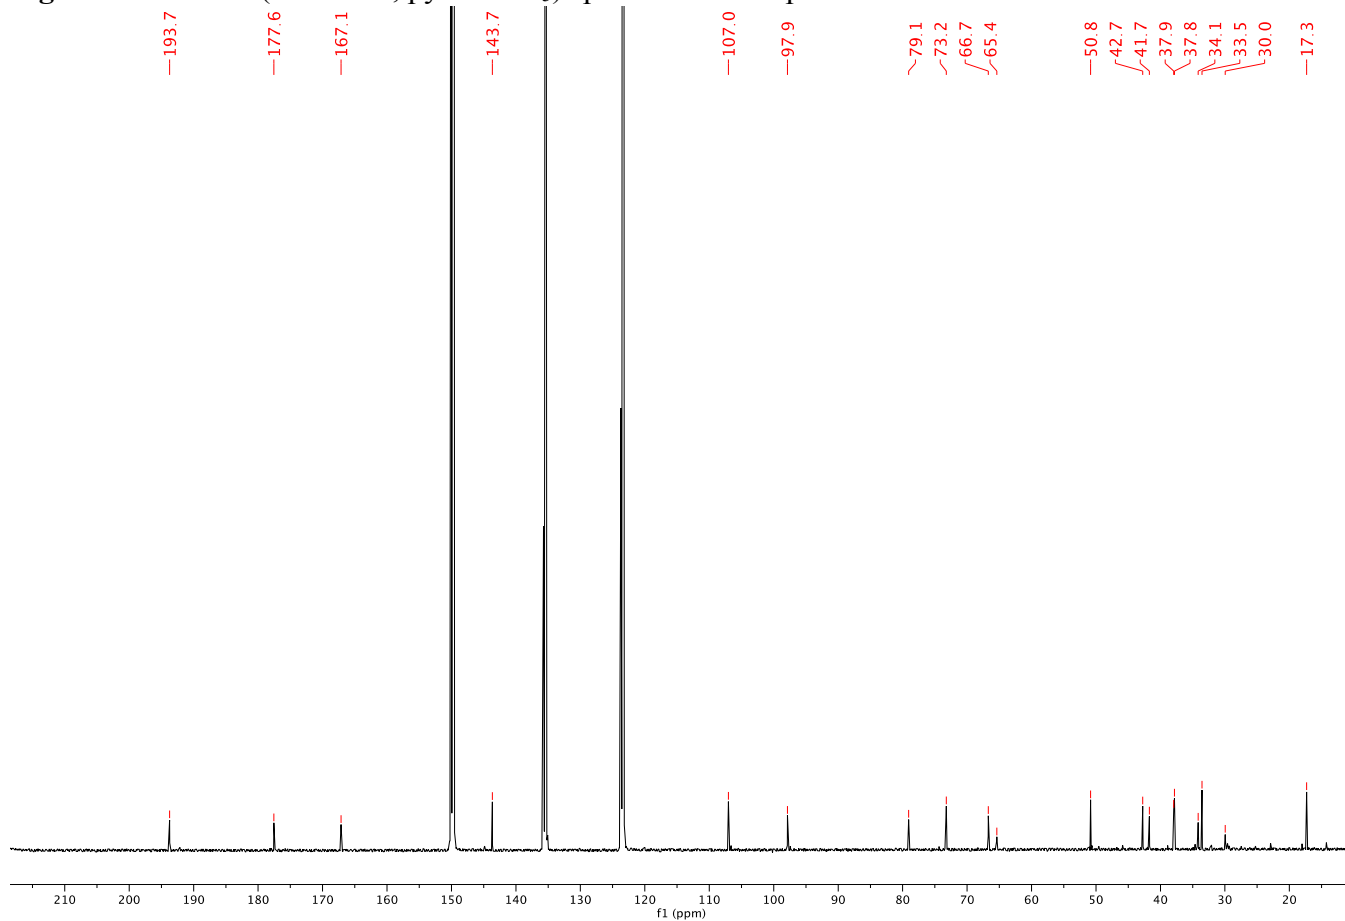

**Fig. S32**  $^1\text{H}$  NMR (500 MHz,  $\text{DMSO-}d_6$ ) spectrum of compound **8**

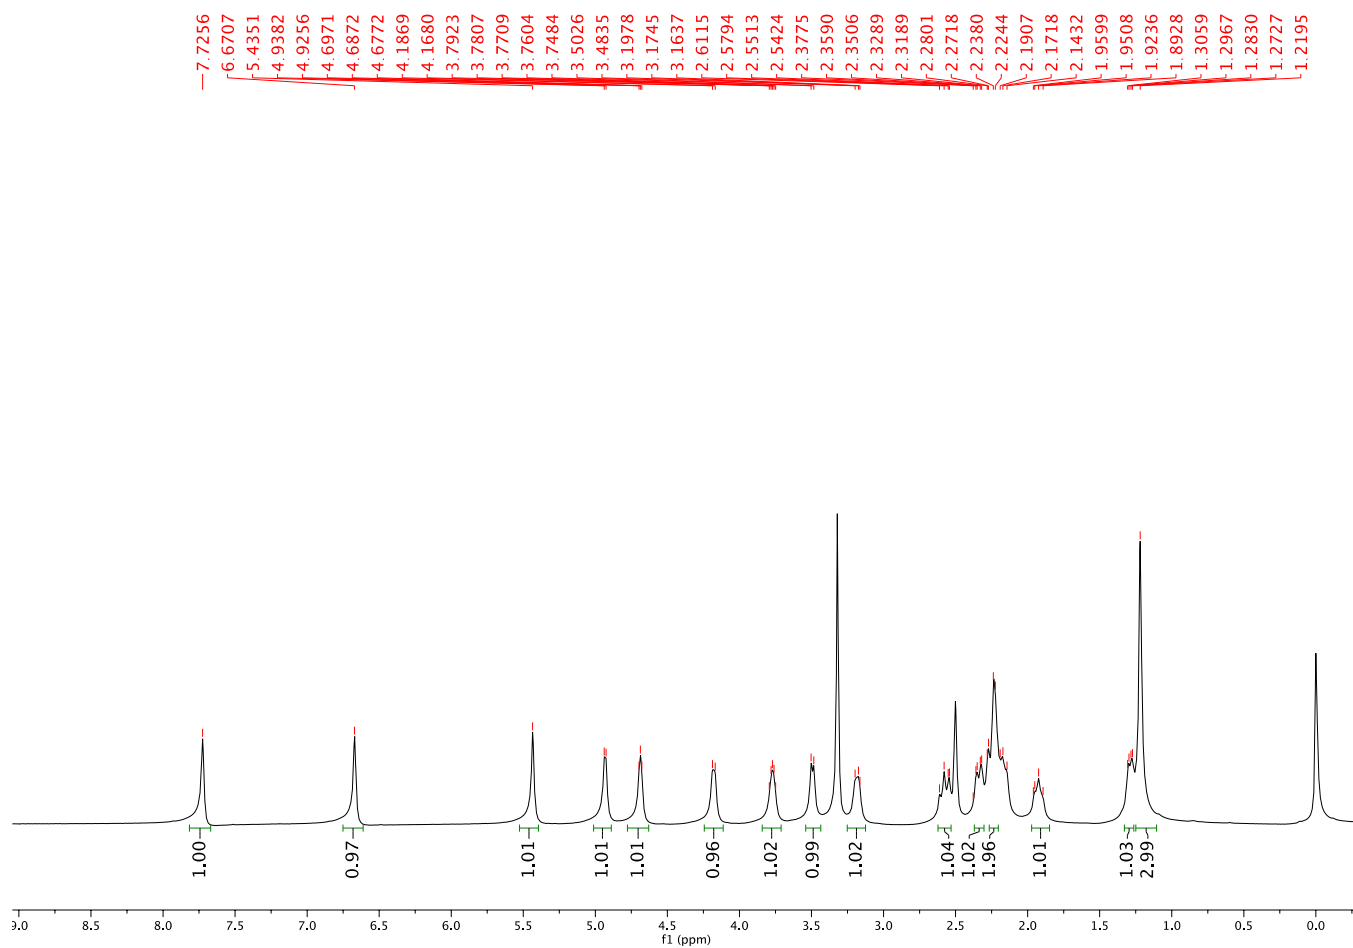

**Fig. S33**  $^{13}\text{C}$  NMR (125 MHz,  $\text{DMSO-}d_6$ ) spectrum of compound **8**

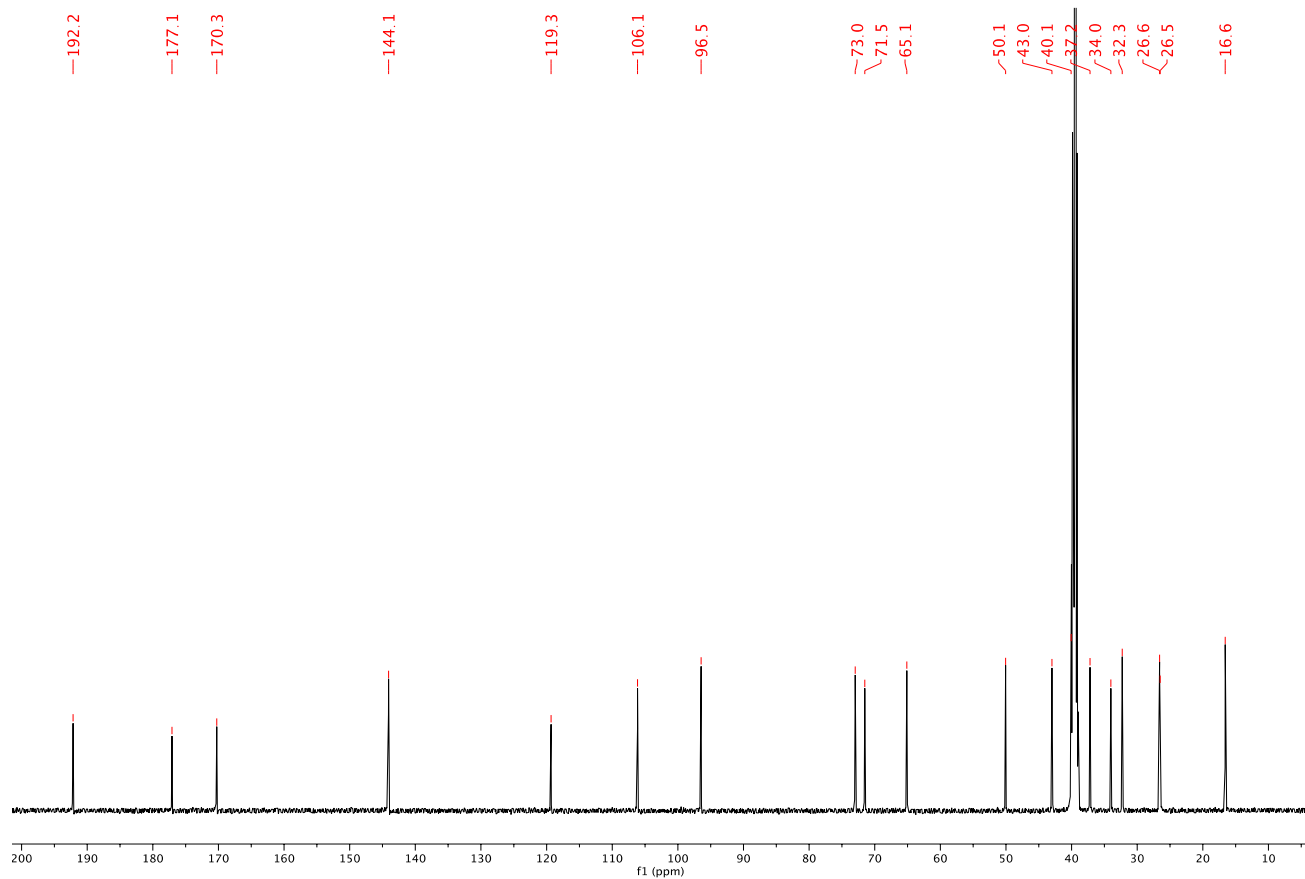

**Fig. S34**  $^1\text{H}$  NMR (500 MHz, Pyridine- $d_5$ ) spectrum of compound **9**

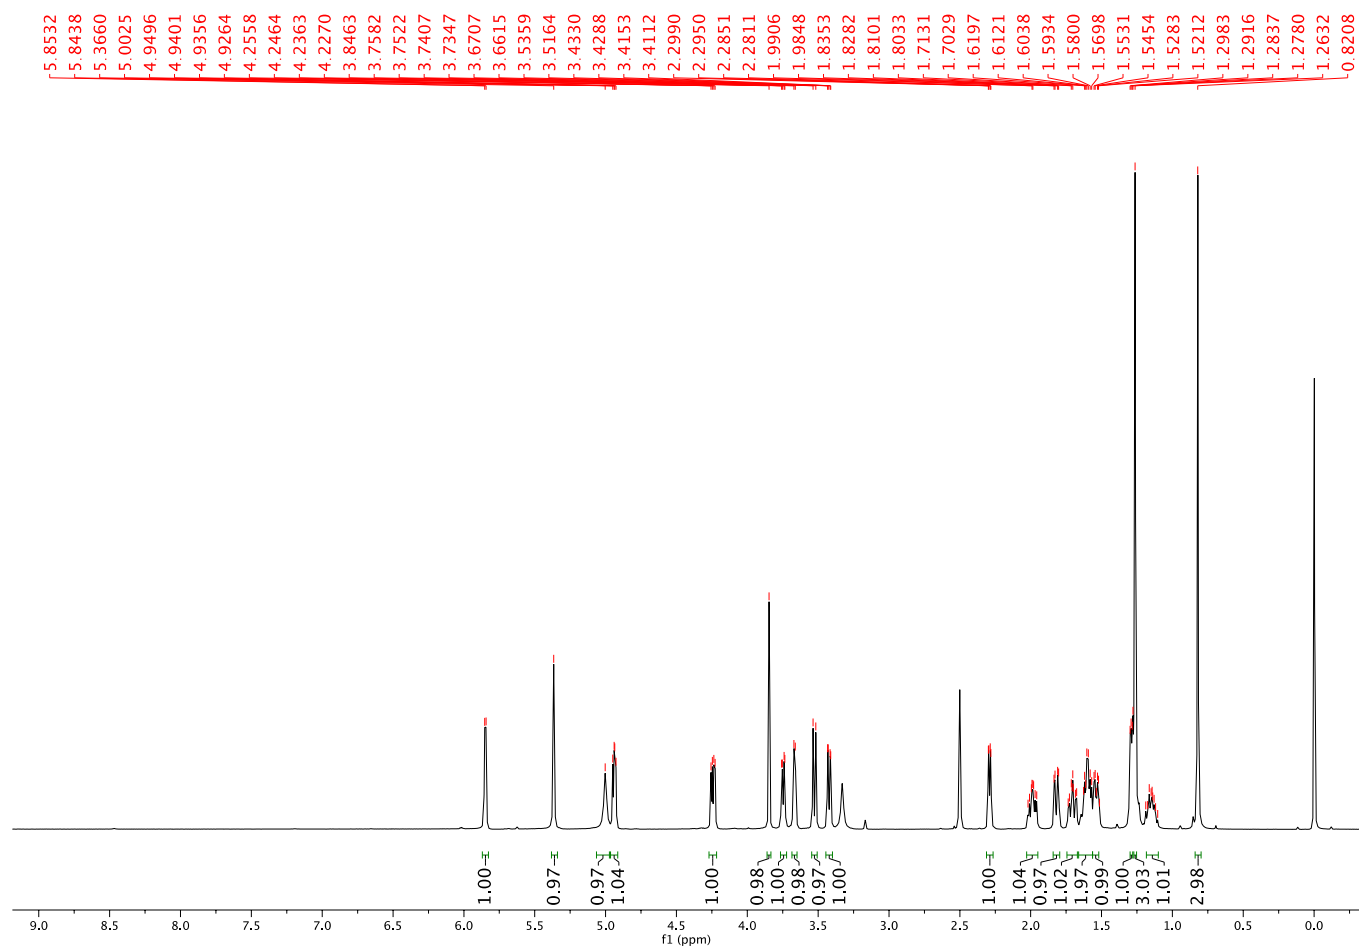

**Fig. S35**  $^{13}\text{C}$  NMR (125 MHz, Pyridine- $d_5$ ) spectrum of compound **9**

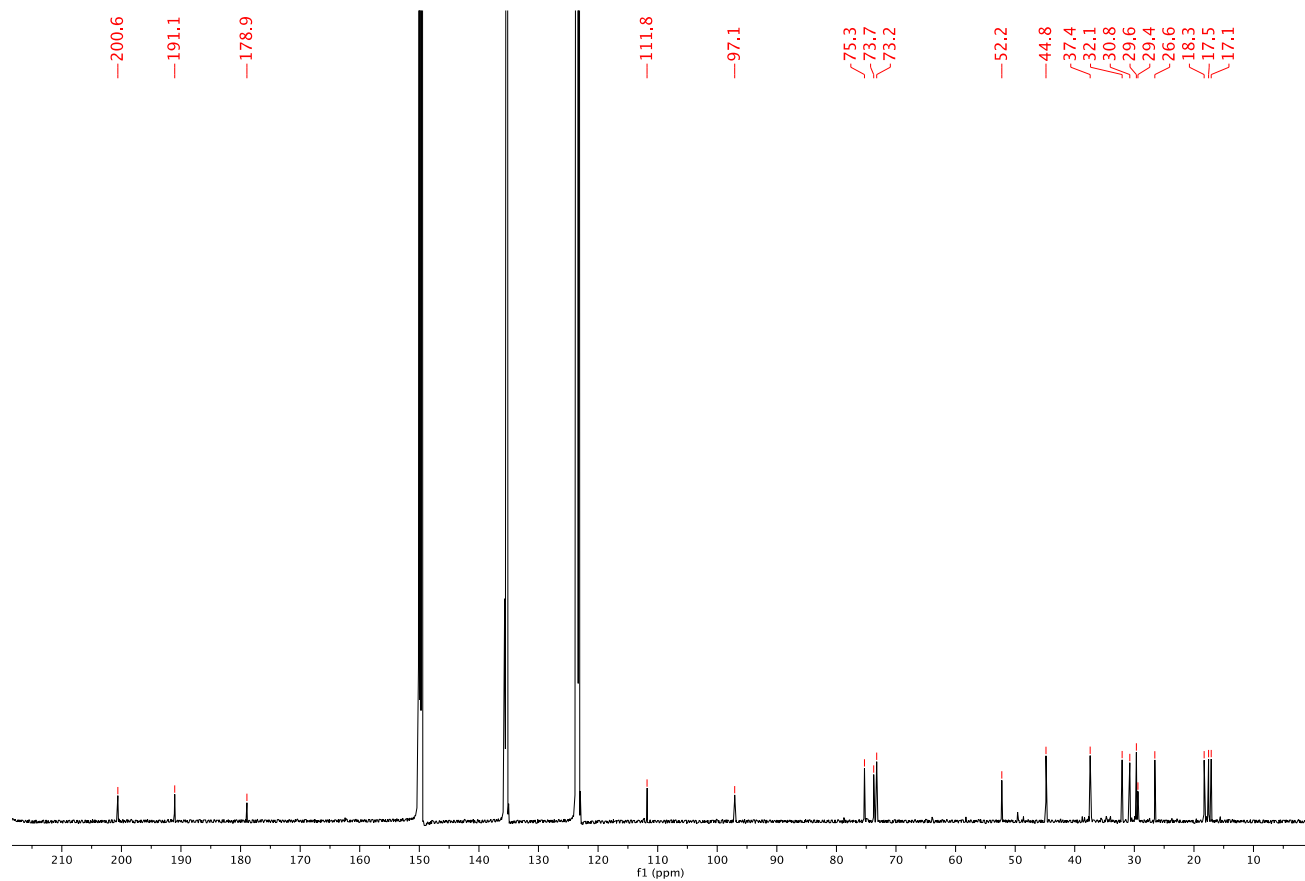

**Fig. S36**  $^1\text{H}$  NMR (500 MHz,  $\text{DMSO-}d_6$ ) spectrum of compound **10**

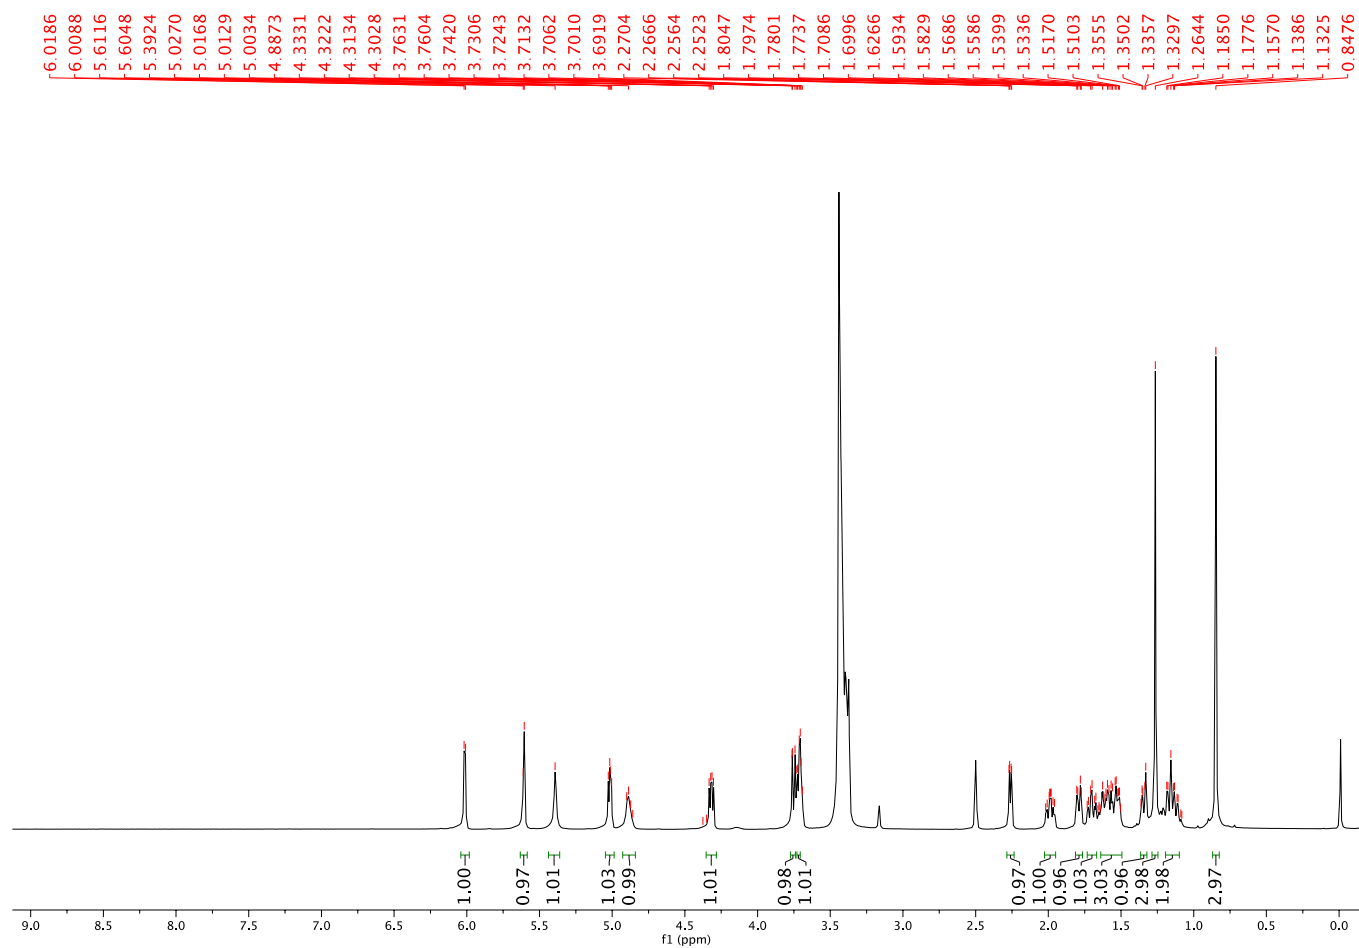

**Fig. S37**  $^{13}\text{C}$  NMR (125 MHz,  $\text{DMSO-}d_6$ ) spectrum of compound **10**

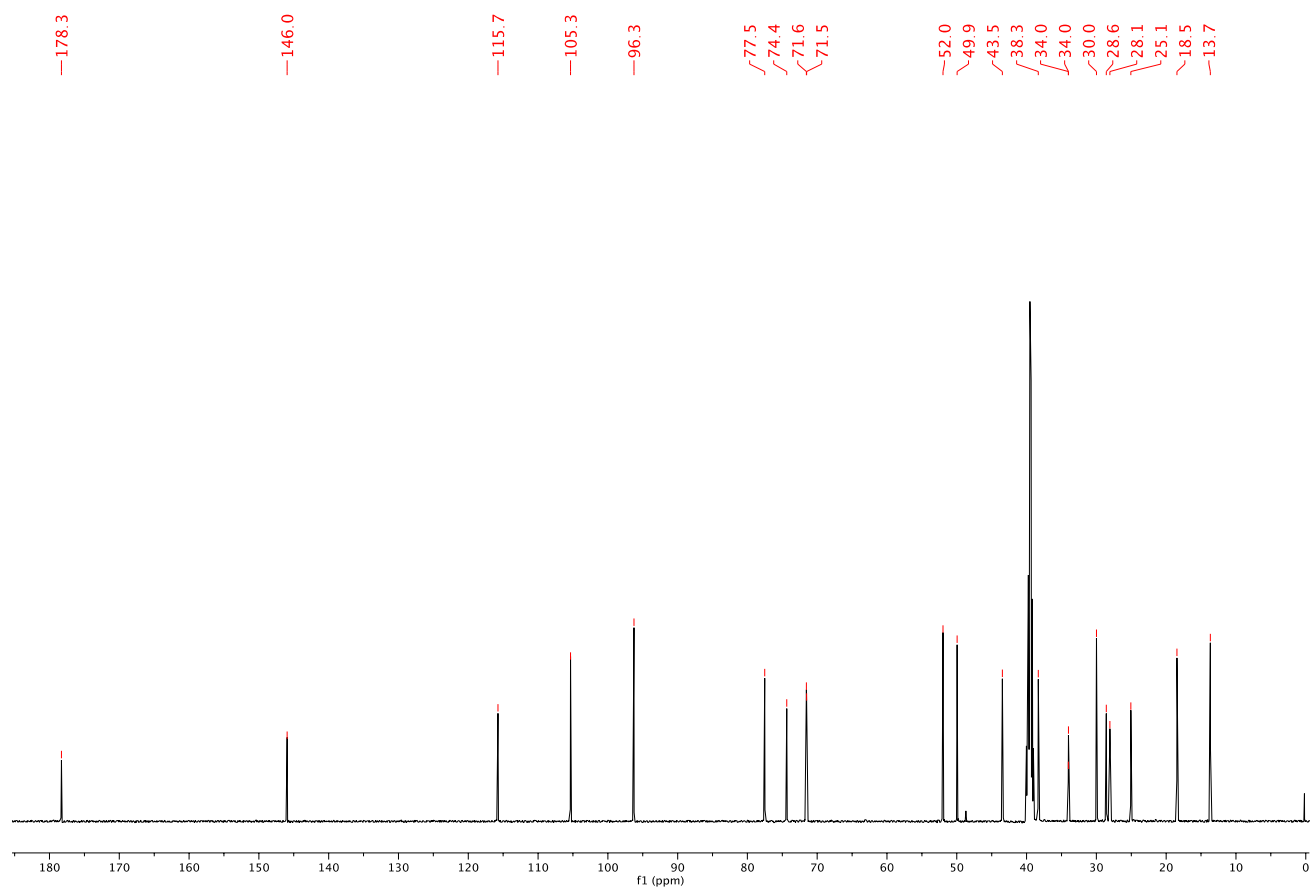

**Fig. S38**  $^1\text{H}$  NMR (500 MHz,  $\text{DMSO-}d_6$ ) spectrum of compound **11**

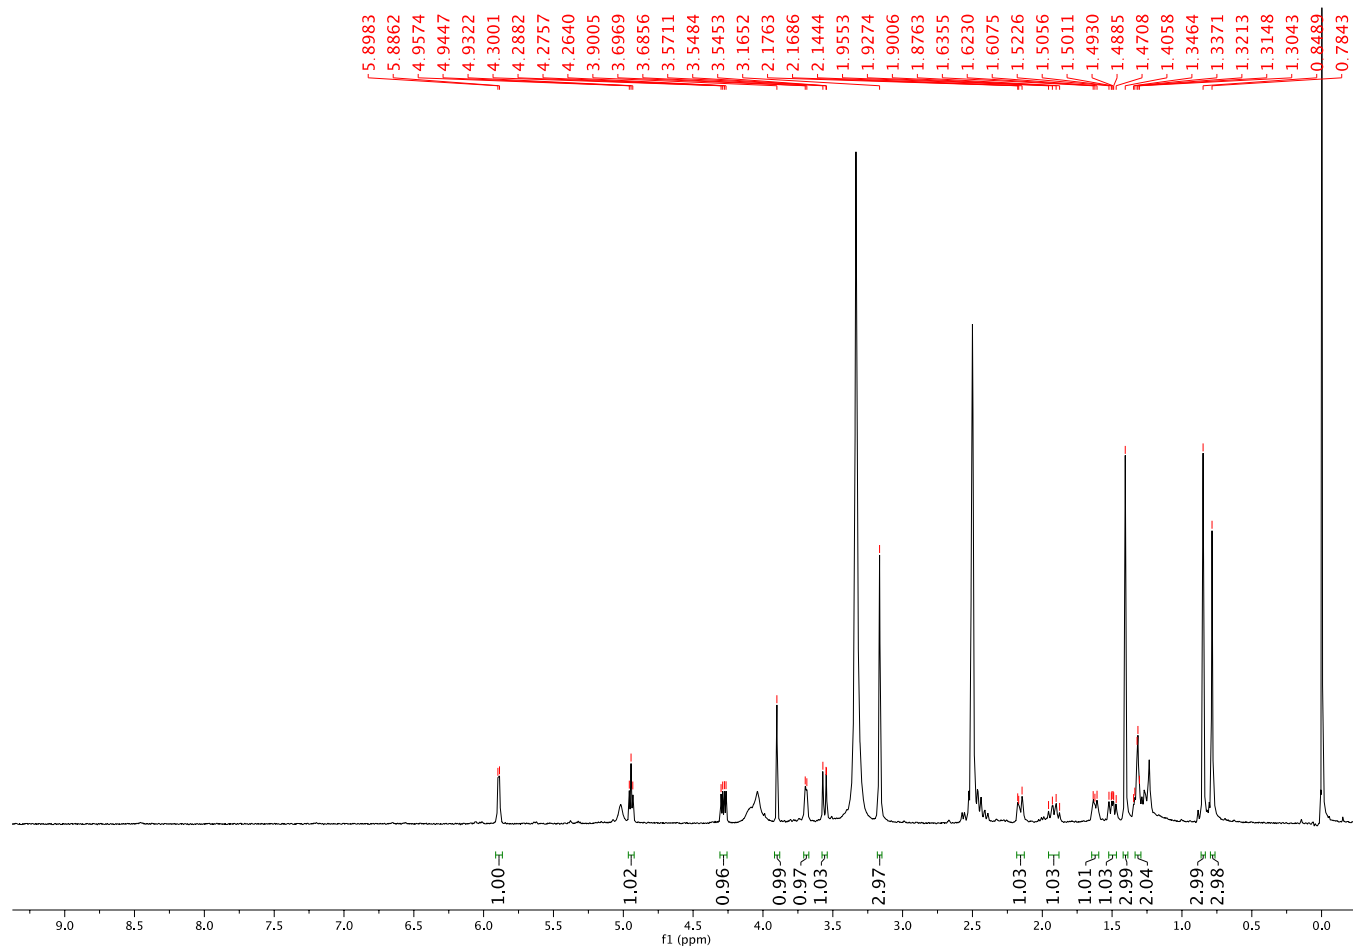

**Fig. S39**  $^{13}\text{C}$  NMR (125 MHz,  $\text{DMSO-}d_6$ ) spectrum of compound **11**

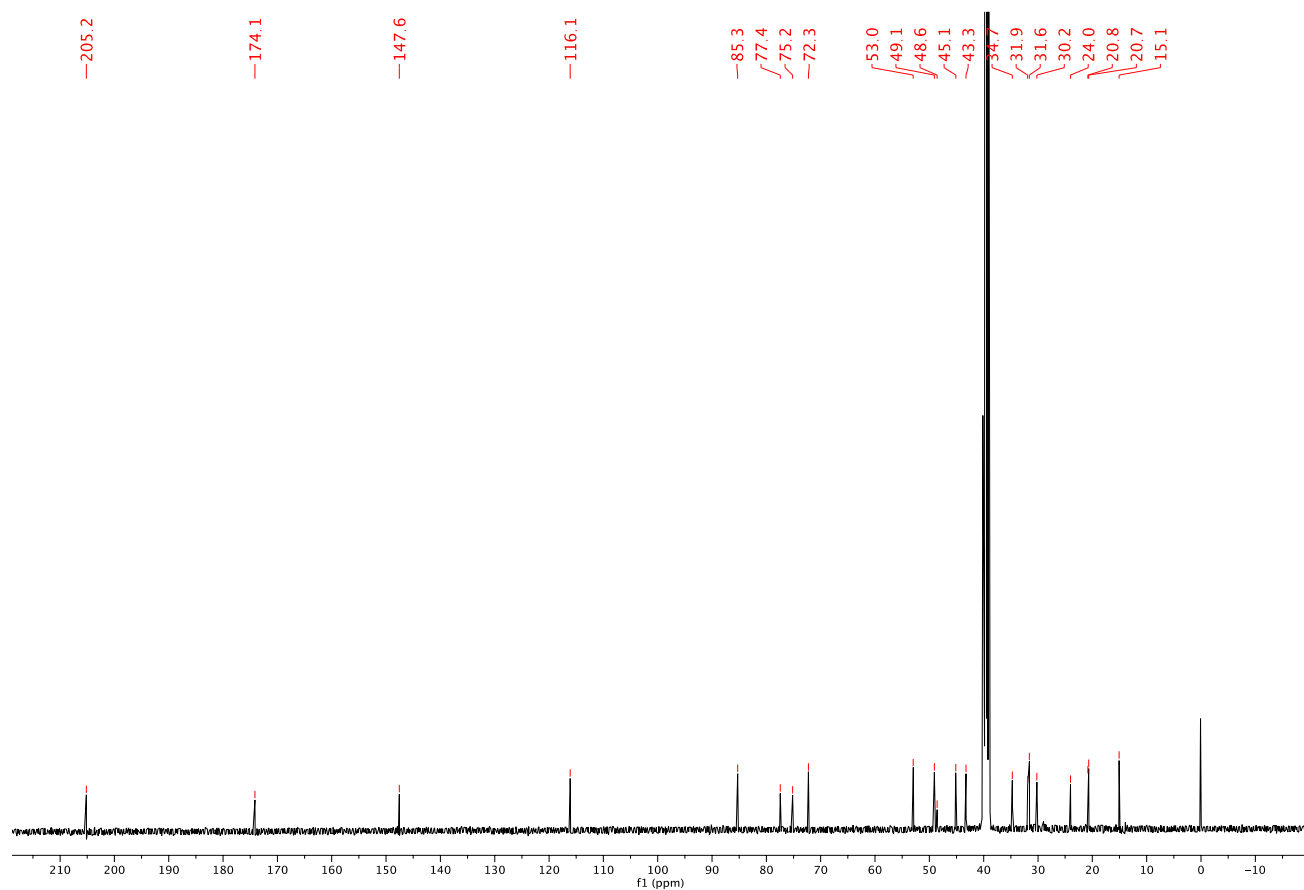

**Fig. S40**  $^1\text{H}$  NMR (500 MHz,  $\text{DMSO-}d_6$ ) spectrum of compound **12**

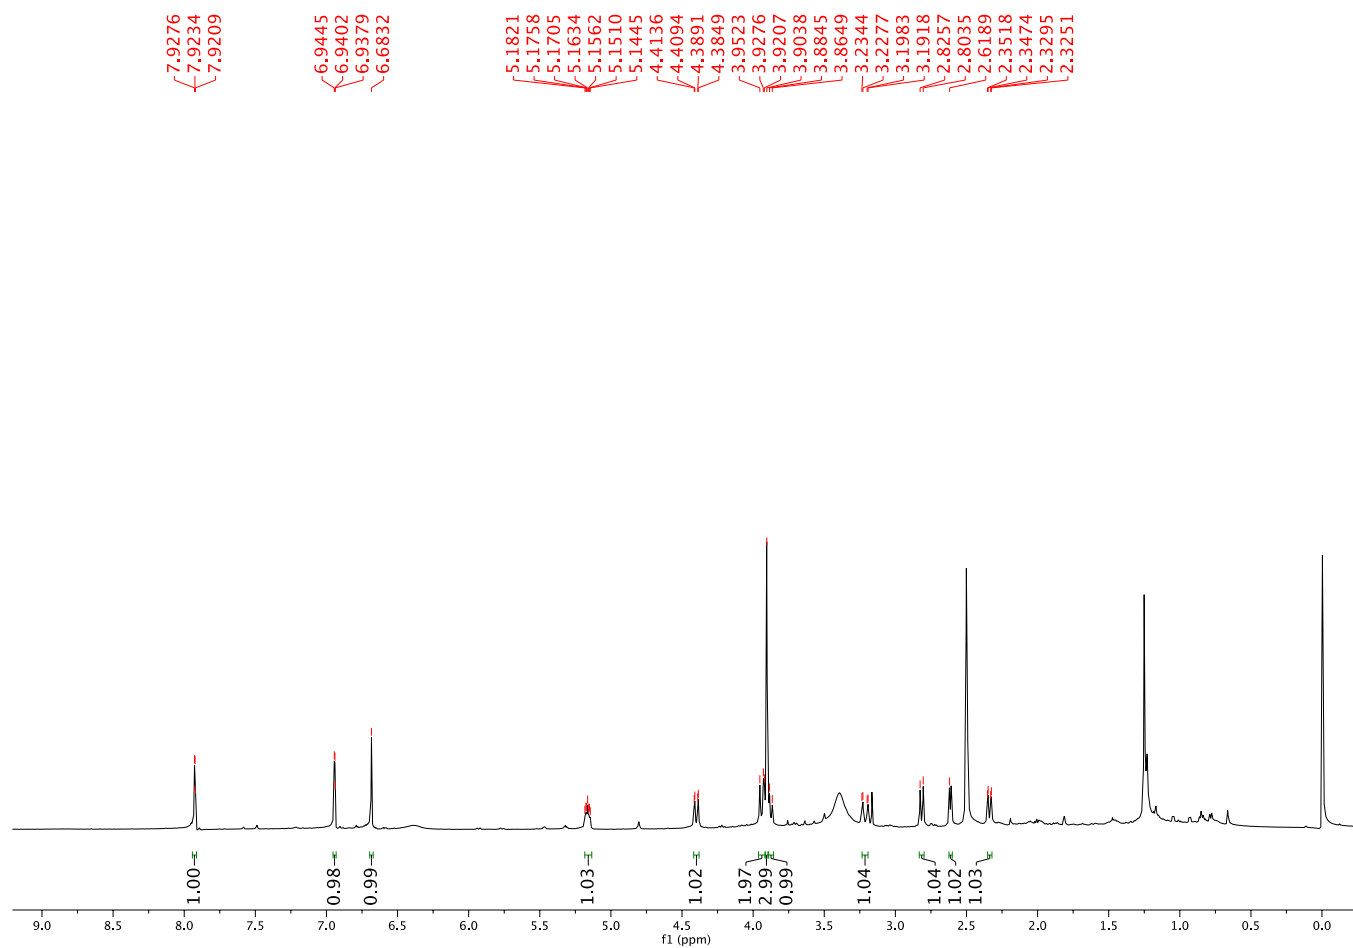

**Fig. S41**  $^{13}\text{C}$  NMR (125 MHz,  $\text{DMSO-}d_6$ ) spectrum of compound **12**

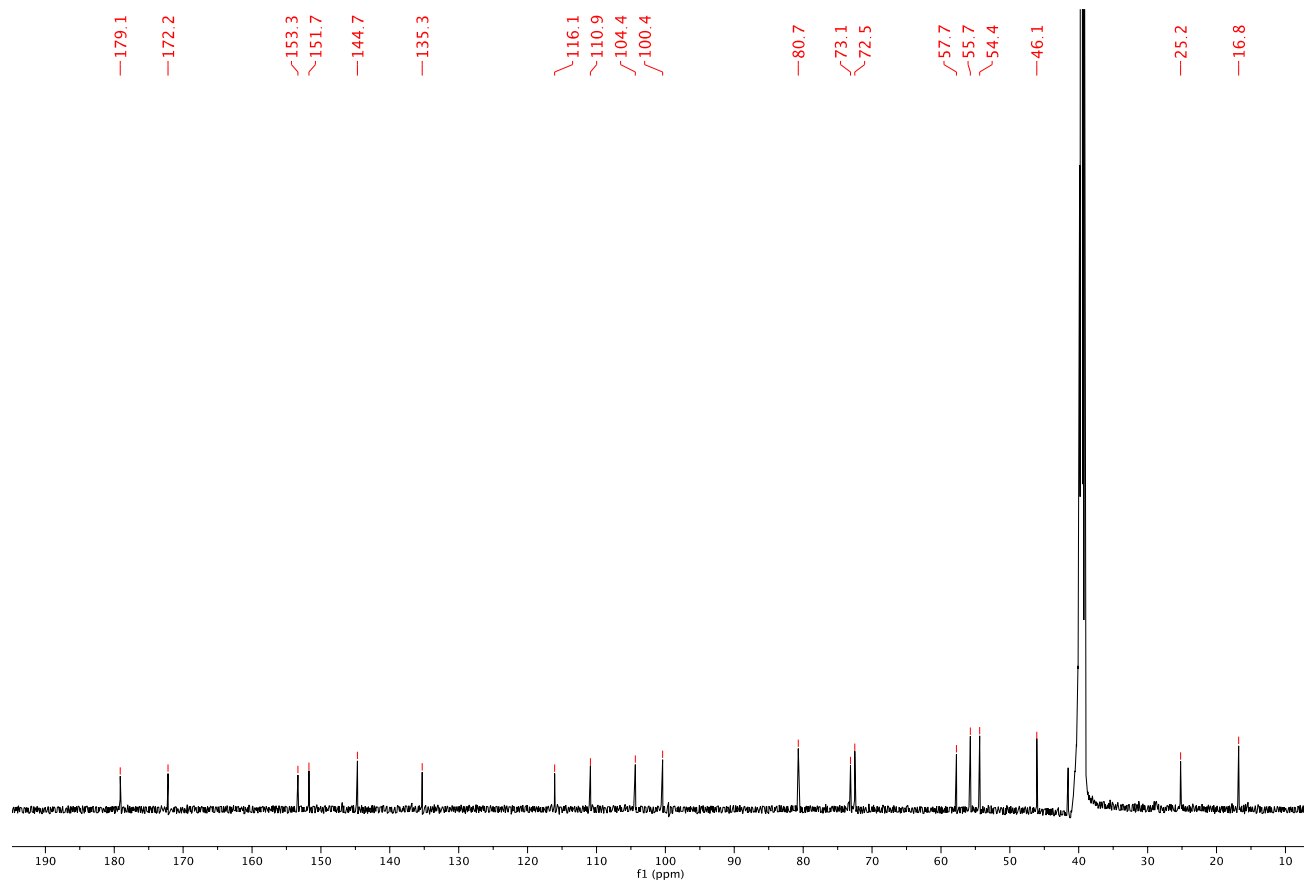



**Fig. S42** HPLC chromatogram of the derivative of the standard L-Glucose

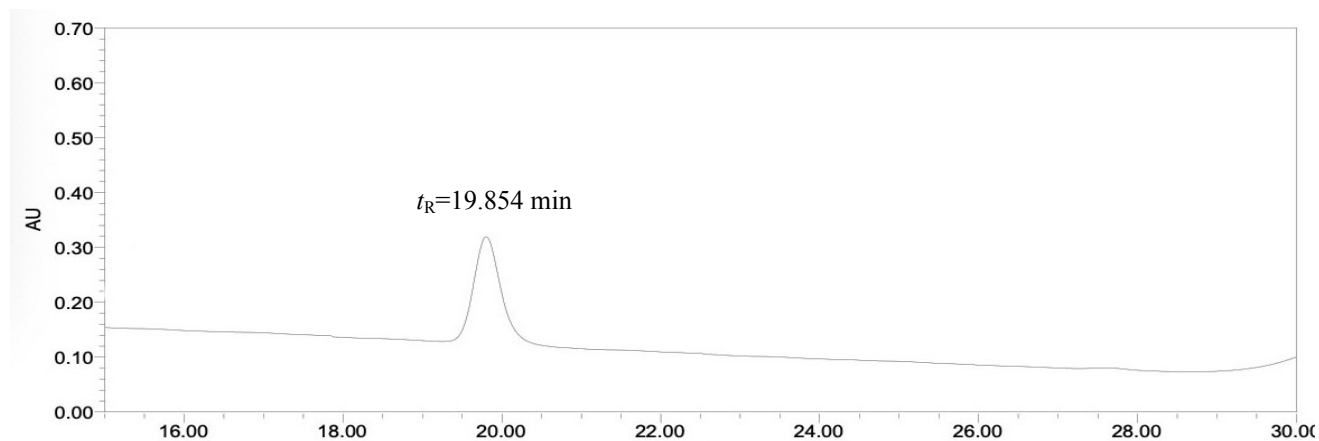

**Fig. S43** HPLC chromatogram of the derivative of the standard D-Glucose

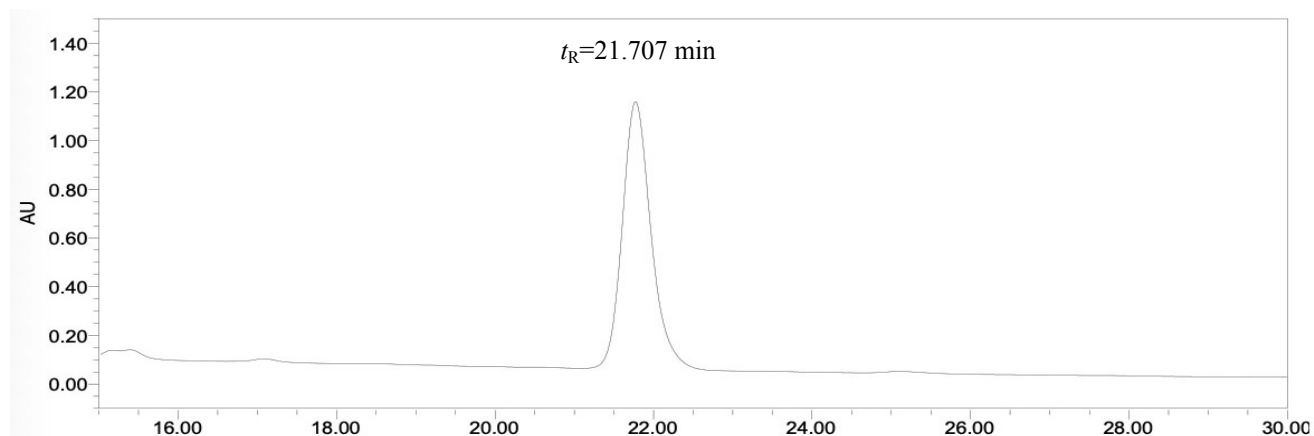

**Fig. S44** HPLC chromatogram of derivative of the hydrolysate of compound 2.

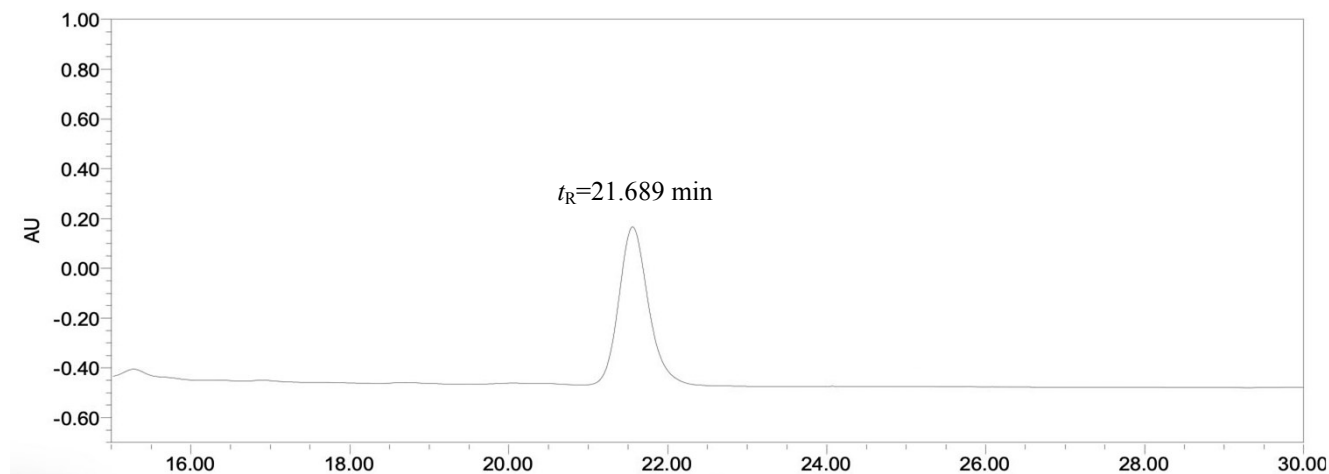

Supplement: d1qo00374g1.pdf [file d1qo00374g1.pdf]
